# Supplementary material
Source: PubMed Central journal article supplement (PMC6439708)
Supplement: jamainternmed-179-394-s001.pdf [file jamainternmed-179-394-s001.pdf]

## Supplementary Online Content

de Souto Barreto P, Rolland Y, Vellas B, Maltais M. Association of long-term exercise training with risk of falls, fractures, hospitalizations, and mortality in older adults: a systematic review and meta-analysis [published online December 28, 2018]. *JAMA Intern Med*.  
doi:10.1001/jamainternmed.2018.5406

**eAppendix 1.** Study Protocol

**eAppendix 2.** Electronic Searches

**eAppendix 3.** Flow Chart of Study Selection

**eAppendix 4.** Risk of Bias

**eAppendix 5.** Description of Exercise Interventions

**eAppendix 6.** Meta-analyses and Meta-regressions for the Outcome “Mortality”

**eAppendix 7.** Meta-analyses and meta-regressions for the outcome “Number of people hospitalized

**eAppendix 8.** Meta-analyses and meta-regressions for the outcome “Fallers”

**eAppendix 9.** Meta-analyses and meta-regressions for the outcome “Fallers with multiple falls”

**eAppendix 10.** Meta-analyses for the outcome “Injurious fallers”

**eAppendix 11.** Meta-analyses and meta-regressions for the outcome “People with fractures”

**eAppendix 12.** Number of participants and events included in the main analysis per study and per outcome

This supplementary material has been provided by the authors to give readers additional information about their work.

## Supplements

### Long-term exercise for protecting against falls, fractures, hospitalizations and mortality in older adults: a systematic review and meta-analysis

#### Summary

|                                                                                                                      |    |
|----------------------------------------------------------------------------------------------------------------------|----|
| <i>Appendix 1. Study Protocol</i> .....                                                                              | 4  |
| 2. Review objectives .....                                                                                           | 4  |
| 3. Methods.....                                                                                                      | 4  |
| 4. Criteria for considering studies for this review.....                                                             | 4  |
| 5. Eligibility criteria (summary) .....                                                                              | 6  |
| 6. Dealing with changes in the procedures of the review .....                                                        | 6  |
| 7. General aspects of the Review Protocol .....                                                                      | 6  |
| 8. Pre-planned quantitative analyses (meta-analysis).....                                                            | 7  |
| <i>Appendix 2. Electronic searches</i> .....                                                                         | 9  |
| 1. Pubmed .....                                                                                                      | 9  |
| 2. Cochrane.....                                                                                                     | 10 |
| 3. SportDiscus.....                                                                                                  | 11 |
| 4. PsychInfo .....                                                                                                   | 11 |
| 5. Ageline.....                                                                                                      | 12 |
| <i>Appendix 3. Flow chart of study selection</i> .....                                                               | 13 |
| <i>Appendix 4. Risk of bias</i> .....                                                                                | 14 |
| <i>Appendix 5. Description of the exercise interventions</i> .....                                                   | 16 |
| <i>Appendix 6. Meta-analyses and meta-regressions for the outcome “Mortality”</i> .....                              | 19 |
| <i>Appendix 7. Meta-analyses and meta-regressions for the outcome “Number of people hospitalized”</i> .....          | 24 |
| <i>Appendix 8. Meta-analyses and meta-regressions for the outcome “Fallers”</i> .....                                | 29 |
| <i>Appendix 9. Meta-analyses and meta-regressions for the outcome “Fallers with multiple falls”</i> .....            | 34 |
| <i>Appendix 10. Meta-analyses for the outcome “Injurious fallers”</i> .....                                          | 38 |
| <i>Appendix 11. Meta-analyses and meta-regressions for the outcome “People with fractures”</i><br>.....              | 42 |
| <i>Appendix 12. Number of participants and events included in the main analysis per study and per outcome.</i> ..... | 48 |



## **Appendix 1. Study Protocol**

### **2. Review objectives**

#### **2.1. Main objective**

To assess the effects of long-term exercise training for protecting against major adverse health events in older populations.

#### **2.2. Secondary objectives**

None

### **3. Methods**

- Firstly, information from randomised controlled trials (RCT) on the effects of exercise training (intervention) for protecting older adults against mortality, hospitalisations, falls, fractures and other major adverse health events (as defined by the authors of original investigations) will be gathered.
- Then, the content of the selected RCTs will be analysed qualitatively (the “review” part of the study).
- Finally, the effects of exercise training for protecting older adults against mortality, hospitalisations, falls, fractures and other major adverse health events will be analysed quantitatively (meta-analysis), if appropriate.

### **4. Criteria for considering studies for this review**

#### **4.1. Study design**

- Randomised controlled trials (both cluster and parallel design) as clearly stated (or when the information is available in the reporting of the study) by the authors of the original studies. Cross-over randomised trials will be accepted, but only the first part of the trial (before cross-over) will be examined both qualitatively and quantitatively.
- For cluster RCTs, where these studies presented an estimate of effect that properly accounted for the cluster design (eg, multilevel analysis), this will be used. Where this was not the case, we will assume that the intra-cluster correlation coefficient (ICC) is the same as for other studies included in the review for that outcome. We will use an ICC from external sources if available; then, we will correct the values for each unadjusted study by the design effect (Cochrane Handbook. Chapter 16. 16.3 Cluster randomized trials. Available at: <http://handbook.cochrane.org/>). If an ICC from an appropriate external source is not available, we will use the raw values of the original studies.

#### **4.2. Participants**

- People 60 years-old or over. Alternatively, baseline mean age of 60 or over will also be accepted.
- Studies developed in any setting (eg, community, nursing homes, etc.) will be included. If appropriate, the potential bias related to the setting where people live will be addressed in sensitivity analysis.

#### **4.3. Interventions**

- Exercise training performed at any frequency, intensity, and session duration.
- Long-term exercise training: intervention length must be  $\geq$  one year (or  $\geq 12$  months or  $\geq 48$  weeks). The 1-year intervention length was set in an attempt of reducing the bias related to including terminally

ill patients who might die in the first months of the study and for whom exercise would probably not influence mortality risk.

- Group-based or individually-based exercise, with or without an exercise instructor will be included.

#### **4.4. Comparisons**

- Comparisons will be made between the exercise intervention and the control group. For comparisons to be made, the only difference between experimental and control groups must be the exercise intervention; coupled interventions (co-interventions), such as, exercise training + another intervention (eg, nutritional or educational interventions) vs. usual care, for example, will be excluded from the review since it is impossible to determine the effects of the exercise intervention alone; however, if exercise + nutrition vs. nutrition alone, then the study will be included. In the case of 2 x 2 interventions (eg, exercise, nutrition, exercise + nutrition, control) only the data for the exercise group alone VS. controls will be used in meta-analysis.

- Interventions that do not have any session of exercise training but that only have educational/motivational aspects to increase physical activity levels as the core element of the intervention will be excluded (eg, when the intervention consists at one session per week or month of educative information on the benefits of physical activity).

- In RCTs that compare more than one exercise intervention to controls, the exercise program that achieves higher volumes of exercise (product of exercise frequency, intensity and session duration) will be used for the quantitative analysis. If the information available in the original studies does not provide enough information for calculating exercise volumes, the exercise group with the highest effective exercise frequency (attendance to exercise programs will be used to calculate the effective frequency of participation) will be retained for analysis. All exercise groups will be analysed qualitatively.

#### **4.5. Outcomes**

Data on the outcomes of interest for this review will come from the whole duration of the trial (between baseline and post-intervention evaluations). Data coming from an observational follow-up period after the end of the intervention will not be used.

##### **4.5.1. Main outcome**

-Mortality: binary variable with the number of people who died per study group

-Hospitalisations: binary variable with the number of people who have been admitted to the hospital (inpatient hospitalisation or  $\geq 24$ hr hospitalisation) per study group. Complementarily, the total number of hospitalisations per study group will also be searched and recorded when available.

-Falls: binary variable with the number of people who have fallen (according to the definition used by original investigators) per study group. Complementarily, the total number of falls per study group will also be searched and recorded when available.

-Fractures: binary variable with the number of people who have had a fracture per study group. Complementarily, the total number of fractures per study group will also be searched and recorded when available.

-All major adverse events: binary variable with the number of people who have had at least one major adverse health event per study group. Major adverse health events are: death, hospitalisation, fall, fracture and any other event defined by original investigators as “major” or “severe”. Complementarily, the total number of major adverse events per study group will also be searched and recorded when available.

#### **4.6. Language issues**

- No language limitations will be set in the electronic search strategy.

#### **5. Eligibility criteria (summary)**

-RCTs comparing the effects of one or more exercise interventions to a control group for protecting older adults against mortality, hospitalisations, falls, fractures and other major adverse health events.

#### **6. Dealing with changes in the procedures of the review**

- Any change to this protocol will be addressed by performing sensitivity analysis (when appropriate) to assess the impact of changes on the review findings.

### **7. General aspects of the Review Protocol**

#### **7.1. Electronic search**

-Electronic searches will be performed by one of the review authors using standard procedures. The protocol for the electronic searches (including search terms and databases) was previously validated by all the authors.

#### **7.2. Assessment of eligibility of studies**

-After performing the electronic searches, duplicate publications will be removed. Then, articles' titles and abstracts will be screened independently by two authors (this procedure will permit to exclude studies completely out of scope) to establish their potential eligibility.

-Divergences with regards to eligibility will be discussed in an in-person meeting between the two raters. If no consensus is obtained, the articles will be included in the next phase of the review process (full-text articles assessed for eligibility).

-Full-text articles of pre-screened studies will then be assessed for eligibility. At least two authors will do this work independently; they will use a standard form to guide them to correctly assign articles as “eligible”, “not eligible” or “needing further information”. Reasons for excluding articles will be recorded.

-Divergences with regards to eligibility will be discussed with a third author.

-Studies will not be excluded systematically only because they did not report any information on the outcomes of this review. Indeed, it is possible that outcomes have been assessed in a given study but, for several reasons, authors did not report them (selective reporting bias); in such a case, authors of the original studies may be contacted to provide information on the outcomes. If the outcomes were not assessed, then the study will be excluded.

#### **7.3. Data extraction**

-This will be done independently by two authors using a standard form specifically developed for this review. The data collection form was previously validated by all the authors.

-We will carefully examine the reports and the data to try to detect potential duplicate publication (multiple reports from the same study). If uncertainties remain about duplicate publication, we will contact (by e-mail) the authors of the original studies to solve any doubts.

-When methodological procedures (for the purposes of evaluating risk of bias) or data (for the purposes of performing a meta-analysis) are insufficiently reported, we may contact authors of the original studies. For complimentary information, we may consider to examine trial registries (eg, ClinicalTrials.gov).

#### **7.4. Other issues related to the “risk of bias” assessment**

- Since exercise behaviour is hard to maintain in the long-term and since we are focusing on long-term interventions ( $\geq 1$  year), we expect to find high attrition rates. For the same reasons we also expect to find low compliance rates. Therefore, particular attention will be paid to potential bias related to Attrition/Exclusions and very low effective frequency of exercise. RCTs for which  $> 40\%$  of exercisers have missing data on the outcomes, when review authors judge that imbalance in missing data across study’s arms are extremely important, or where the reasons for these missing data differ across study’s arms and differences are likely to introduce bias, will be considered as “High Risk” due to attrition. These studies will not make part of the Primary Analysis in meta-analysis, but will be integrated in sensitivity analysis.

- RCTs for which the effective frequency of exercise was  $< 1x/week$  will be considered as at High Risk of “Other Bias” because this weekly frequency is unlikely to promote the benefits of exercise (especially, when considering physiological benefits). These studies will not make part of the Primary Analysis in meta-analysis, but will be integrated in sensitivity analysis.

-Sensitivity analysis in the meta-analysis will be performed by opposing studies with low risk of bias regarding attrition and exercise frequency to those with a high risk of bias.

-If bias related to selective reporting of the outcomes is detected, review authors will systematically contact the authors of the original studies to require information needed for doing meta-analysis (eg, if authors reported to have assessed hospitalisations in the Methods section of the article, but only indicated that “differences between groups for hospitalisations were not significant” (with no data) in the results section).

#### **8. Pre-planned quantitative analyses (meta-analysis)**

- For the binary outcomes, we will combine the estimates for each study using risk ratio (RR). Discrete/continuous variables will be combined using the mean difference approach. Because we expected to find high heterogeneity across studies, we will use DerSimonian and Laird’s random effects model (DerSimonian and Laird, 1986) for analysis of all outcomes (Mantel-Haenszel method for binary outcomes). The degree of heterogeneity will be assessed by visual inspection, and by the  $I^2$  method ( $I^2 > 50\%$  will be considered as substantial heterogeneity) (Higgins et al.,2003); when  $I^2 < 50\%$ , a fixed-effect model will be performed as a sensitivity analysis. Small-study effects will be evaluated using the Egger’s

test (regression of estimates against their standard error), with  $p < 0.1$  indicating substantial asymmetry.

When the Egger's test shows evidence of asymmetry, a funnel plot will be computed for visual input.

- Subgroup analysis will be done: (1) studies with high risk of bias VS. studies with low risk of bias (especially regarding Attrition); (2) effective exercise frequency  $\geq 1x/week$  VS.  $< 1x/week$ ; (3) studies for disease-specific populations (eg, people with dementia/diabetes/heart disease) VS. non-disease specific.

-If the number of RCTs allow, we will consider performing meta-regressions to examine whether exercise characteristics (eg, frequency, intensity, session duration, and type (eg, aerobic exercise, strength training, or their combination – the so-called multicomponent training)) are associated with the outcomes.



## Appendix 2. Electronic searches

### 1. Pubmed

Date searched: 20.02.2018

Dates of publication of retrieved articles: from July-August 1976 to present

Number of studies retrieved: 597

| Search | Query                                                                                  | Items found |
|--------|----------------------------------------------------------------------------------------|-------------|
| #1     | Elder* [Title/Abstract]                                                                | 230631      |
| #2     | “older adults” [Title/Abstract]                                                        | 57233       |
| #3     | “older adult” [Title/Abstract]                                                         | 5838        |
| #4     | “older population”[Title/Abstract]                                                     | 3934        |
| #5     | “very old”[Title/Abstract]                                                             | 3877        |
| #6     | “oldest old”[Title/Abstract]                                                           | 2009        |
| #7     | aged[Title/Abstract]                                                                   | 491677      |
| #8     | #1 OR #2 OR #3 OR #4 OR #5 OR #6 OR #7                                                 | 720745      |
| #9     | “exercis*”[Title/Abstract]                                                             | 261053      |
| #10    | “physical activity”[Title/Abstract]                                                    | 87920       |
| #11    | “physical therapy”[Title/Abstract]                                                     | 17682       |
| #12    | “walk*”[Title/Abstract]                                                                | 99515       |
| #13    | “aerobic program”[Title/Abstract]                                                      | 28          |
| #14    | exercise[MeSH Terms]                                                                   | 163973      |
| #15    | “strength program”[Title/Abstract]                                                     | 34          |
| #16    | resistance training[MeSH Terms]                                                        | 6351        |
| #17    | “training”[Title/Abstract]                                                             | 339581      |
| #18    | “physical rehabilitation”[Title/Abstract]                                              | 1587        |
| #19    | sport*[Title/Abstract]                                                                 | 64036       |
| #20    | aerobic exercise[MeSH Terms]                                                           | 163973      |
| #21    | strength training[MeSH Terms]                                                          | 6351        |
| #22    | #9 OR #10 OR #11 OR #12 OR #13 OR #14 OR #15 OR #16 OR #17 OR #18 OR #19 OR #20 OR #21 | 788748      |
| #23    | “randomized controlled trial”[Publication Type]                                        | 458885      |
| #24    | death*[Title/Abstract]                                                                 | 717059      |
| #25    | died[Title/Abstract]                                                                   | 217918      |
| #26    | mortality[Title/Abstract]                                                              | 643238      |
| #27    | hospitali*[Title/Abstract]                                                             | 208554      |
| #28    | “Adverse event”[Title/Abstract]                                                        | 21251       |
| #29    | “Adverse events”[Title/Abstract]                                                       | 112947      |
| #30    | #24 OR #25 OR #26 OR #27 OR #28 OR #29                                                 | 1592617     |
| #31    | <b>#8 AND #22 AND #23 AND #30</b>                                                      | <b>597</b>  |

## 2. Cochrane

Date searched: 01.03.2018

Dates of publication of retrieved articles: from July-August 1976 to present

Number of studies retrieved: 1633

| ID  | Search                                                                                                                                                          |
|-----|-----------------------------------------------------------------------------------------------------------------------------------------------------------------|
| #1  | elder*:ti,ab,kw (Word variations have been searched)                                                                                                            |
| #2  | older adult*:ti,ab,kw (Word variations have been searched)                                                                                                      |
| #3  | very old:ti,ab,kw (Word variations have been searched)                                                                                                          |
| #4  | older population or oldest old:ti,ab,kw (Word variations have been searched)                                                                                    |
| #5  | #1 or #2 or #3 or #4                                                                                                                                            |
| #6  | exercis*:ti,ab,kw, "physical activity":ti,ab,kw or "training": ti,ab,kw, or physical therapy: ti,ab,kw, or walk*: ti,ab,kw (Word variations have been searched) |
| #7  | aerobic program:ti,ab,kw, or strength program: ti,ab,kw, or physical rehabilitation: ti,ab,kw or sport: ti,ab,kw (Word variations have been searched)           |
| #8  | MeSH descriptor: [Exercise] explode all trees                                                                                                                   |
| #9  | MeSH descriptor: [Resistance Training] explode all trees                                                                                                        |
| #10 | #6 or #7 or #8 or #9                                                                                                                                            |
| #11 | death*:ti,ab,kw or "death":ti,ab,kw or died:ti,ab,kw or "mortality":ti,ab,kw or hospitali*:ti,ab,kw                                                             |
| #12 | adverse event*:ti,ab,kw                                                                                                                                         |
| #13 | #11 or #12                                                                                                                                                      |
| #14 | "randomised clinical trial":pt                                                                                                                                  |
| #15 | randomized controlled trial:ti,ab,kw or random*:ti,ab,kw or trial:ti,ab,kw or randomised controlled trial:ti,ab,kw                                              |
| #16 | #5 and #10 and #13                                                                                                                                              |
| #17 | #16 and #15                                                                                                                                                     |

### 3. SportDiscus

Date searched: 20.02.2018

Dates of publication of retrieved articles: from March 1990 to present

Number of studies retrieved: 291

| Search     | Query                                                                                                                                                                                                                                                        | Items found |
|------------|--------------------------------------------------------------------------------------------------------------------------------------------------------------------------------------------------------------------------------------------------------------|-------------|
| S1         | TI elder* OR AB elder* OR TI older adult* OR AB older adult* OR TI older population OR TI age* OR AB age* or TI oldest old OR AB oldest old OR TI old* OR AB old*                                                                                            | 197,841     |
| S2         | TI very old OR AB very old                                                                                                                                                                                                                                   | 164         |
| S3         | S1 OR S2                                                                                                                                                                                                                                                     | 197,841     |
| S4         | TI exercis* OR AB exercis* OR TI physical activity OR AB physical activity OR TI training OR AB training OR TI physical therapy OR AB physical therapy OR TI walk* OR AB walk* OR TI aerobic program OR AB aerobic program                                   | 294,496     |
| S5         | TI aerobic training OR AB aerobic training OR TI aerobic* OR AB aerobic* OR TI strength program OR AB strength program or TI strength training OR AB strength training OR TI physical rehabilitation OR AB physical rehabilitation OR TI sport* OR AB sport* | 320,150     |
| S6         | TI resistance training OR AB resistance training                                                                                                                                                                                                             | 6,041       |
| S7         | S4 OR S5 OR S6                                                                                                                                                                                                                                               | 540,799     |
| S8         | TI death, OR AB death OR TI died OR AB died OR TI hospitali* OR AB hospitali* OR TI mortality OR AB mortality OR TI adverse event* OR AB adverse event*                                                                                                      | 35,021      |
| S9         | TI randomi#ed controlled trial* OR AB randomi#ed controlled trial* OR TI clinical trial OR AB clinical trial OR TI random* OR AB random* OR TI trial or AB trial                                                                                             | 66,496      |
| <b>S10</b> | <b>S3 AND S7 AND S8 AND S9</b>                                                                                                                                                                                                                               | <b>291</b>  |

### 4. PsychInfo

Date searched: 20.02.2018

Number of studies retrieved: 1,371

| Search    | Query                                                                                                                                                                                                                                        | Items found  |
|-----------|----------------------------------------------------------------------------------------------------------------------------------------------------------------------------------------------------------------------------------------------|--------------|
| S1        | MR clinical trial OR AB randomi#ed controlled trial* OR TI randomi#ed controlled trial* OR TI randomi#ed or AB randomi#ed OR TI random* OR AB random* OR TI trial* OR AB trial*                                                              | 281,752      |
| S2        | TI sport* OR AB sport* or TI physical* OR AB physical* OR AB exercise* or TI exercise* OR AB aerobic exercise OR TI aerobic exercise OR TI resistance exercise OR AB resistance exercise or TI resistance training OR AB resistance training | 292,676      |
| S3        | TI walk* OR AB walk* OR TI physical rehabilitation OR AB physical rehabilitation OR AB training OR TI training OR AB physical activity OR TI physical activity                                                                               | 293,195      |
| S4        | S2 OR S3                                                                                                                                                                                                                                     | 520,416      |
| S5        | TI mortality OR AB mortality OR TI died OR AB died OR AB death OR TI death OR TI hospital* OR AB hospital* OR TI adverse event* OR AB adverse event*                                                                                         | 250,285      |
| S6        | TI age* OR AB age* OR TI elder* OR AB elder* OR TI old* OR AB old* OR TI older adult* OR AB older adult* OR AB oldest old OR TI oldest old OR TI older population OR AB older population                                                     | 1,029,828    |
| <b>S7</b> | <b>(TI age* OR AB age* OR TI elder* OR AB elder* OR TI old* OR AB old* OR TI older adult* OR AB older adult* OR TI oldest old OR AB oldest old OR TI older population OR AB older population) AND (S1 AND S4 AND S5 AND S6)</b>              | <b>1,371</b> |

## 5. Ageline

Date searched: 05.03.2018

Number of studies retrieved: 105

| Search    | Query                                                                                                                                                                                                                                                                                                  | Items found |
|-----------|--------------------------------------------------------------------------------------------------------------------------------------------------------------------------------------------------------------------------------------------------------------------------------------------------------|-------------|
| S1        | TI elder* OR AB elder* OR TI “older adult” OR AB “older adult” OR TI “older population” OR AB “older population” OR TI “very old” OR AB “very old” OR TI “oldest old” OR AB “oldest old” OR TI aged OR AB aged                                                                                         | 84,287      |
| S2        | TI exercis* OR AB exercis* OR TI “physical activity” or AB “physical activity” OR TI training OR AB training OR TI “physical therapy” OR AB “physical therapy” OR TI walk* OR AB walk* OR TI “aerobic program” OR AB “aerobic program”                                                                 | 19,304      |
| S3        | TI “strength program” OR AB “strength program” OR TI “physical rehabilitation” OR AB “physical rehabilitation” OR TI sport* OR AB sport* OR TI “aerobic exercise” or AB “aerobic exercise” OR TI “strength training” OR AB “strength training” OR TI “resistance training” OR AB “resistance training” | 1,304       |
| S4        | TI death* OR AB death* OR TI died OR AB died OR TI mortality OR AB mortality OR TI hospitali* OR AB hospitali* OR TI “adverse event” OR AB “adverse event”                                                                                                                                             | 16,195      |
| S5        | TI random* OR AB random* OR TI randomized controlled trial* OR AB randomized controlled trial*                                                                                                                                                                                                         | 7,647       |
| S6        | S2 OR S3                                                                                                                                                                                                                                                                                               | 19,682      |
| <b>S7</b> | <b>S1 AND S4 AND S5 AND S6</b>                                                                                                                                                                                                                                                                         | <b>105</b>  |

### Appendix 3. Flow chart of study selection

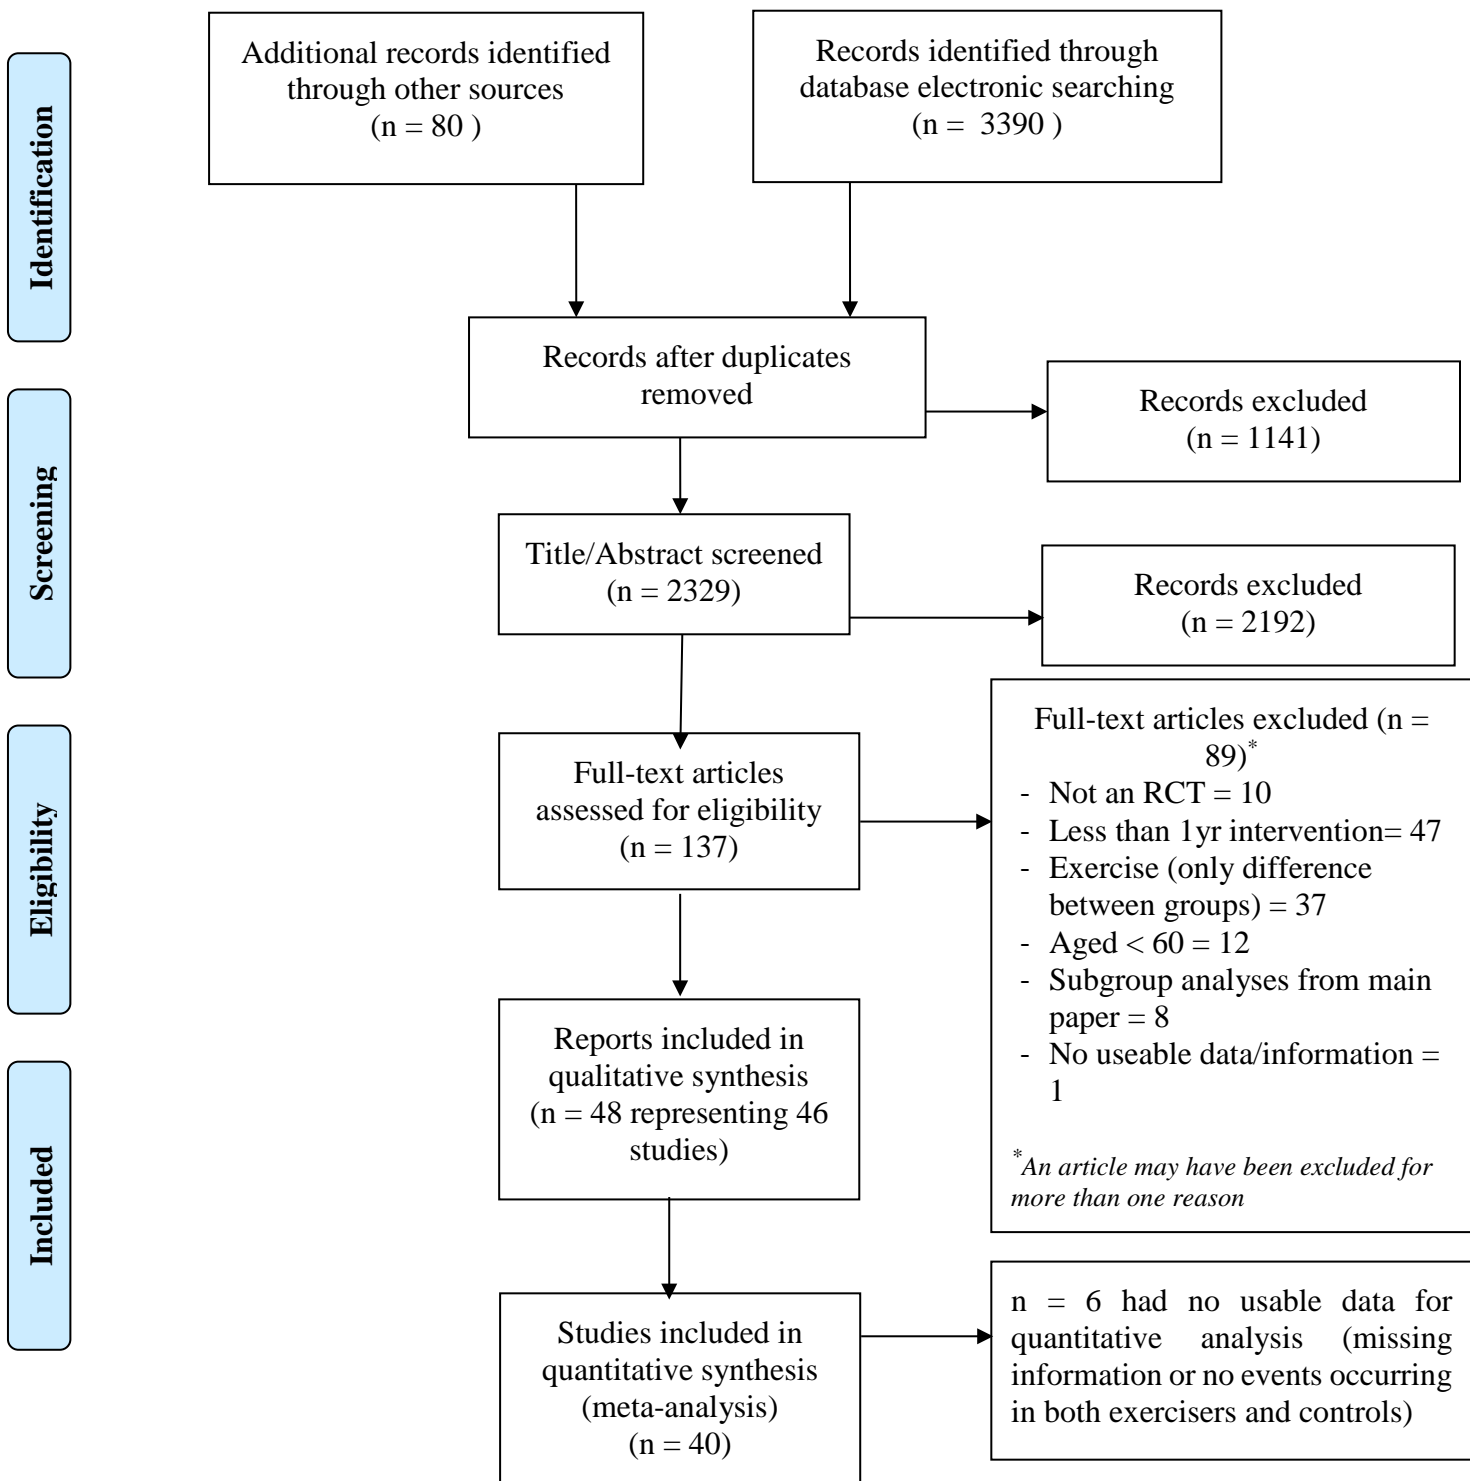

#### Appendix 4. Risk of bias

|                               | Random sequence generation | Allocation concealment | Blinding of participants and personnel | Blinding of outcome assessment | Incomplete outcome data | Selective reporting | Other sources of bias |
|-------------------------------|----------------------------|------------------------|----------------------------------------|--------------------------------|-------------------------|---------------------|-----------------------|
| Belardinelli 2012             |                            |                        |                                        |                                |                         |                     |                       |
| Barnett 2003                  |                            |                        |                                        |                                |                         |                     |                       |
| Bunout 2005                   |                            |                        |                                        |                                |                         |                     |                       |
| O'Connor 2009/Blumenthal 2012 |                            |                        |                                        |                                |                         |                     |                       |
| Campbell 1997                 |                            |                        |                                        |                                |                         |                     |                       |
| Dangour 2011                  |                            |                        |                                        |                                |                         |                     |                       |
| El-Khoury 2015                |                            |                        |                                        |                                |                         |                     |                       |
| Galvao 2014                   |                            |                        |                                        |                                |                         |                     |                       |
| Gianoudis 2014                |                            |                        |                                        |                                |                         |                     |                       |
| Hambrecht 2004                |                            |                        |                                        |                                |                         |                     |                       |
| Hewitt 2018                   |                            |                        |                                        |                                |                         |                     |                       |
| Karinkanta 2007               |                            |                        |                                        |                                |                         |                     |                       |
| Kemmler 2010                  |                            |                        |                                        |                                |                         |                     |                       |
| King 2002                     |                            |                        |                                        |                                |                         |                     |                       |
| Kovacs 2013                   |                            |                        |                                        |                                |                         |                     |                       |
| Lam 2012                      |                            |                        |                                        |                                |                         |                     |                       |
| Lam 2015                      |                            |                        |                                        |                                |                         |                     |                       |
| Lord 1995                     |                            |                        |                                        |                                |                         |                     |                       |
| Lord 2003                     |                            |                        |                                        |                                |                         |                     |                       |
| Liu-Ambrose 2011              |                            |                        |                                        |                                |                         |                     |                       |
| MacRae 1994                   |                            |                        |                                        |                                |                         |                     |                       |

|                                         |  |  |  |  |  |  |  |
|-----------------------------------------|--|--|--|--|--|--|--|
| Merom 2015                              |  |  |  |  |  |  |  |
| Messier 2004                            |  |  |  |  |  |  |  |
| Messier 2013                            |  |  |  |  |  |  |  |
| Munro 2004                              |  |  |  |  |  |  |  |
| Muscari 2010                            |  |  |  |  |  |  |  |
| Mustata 2011                            |  |  |  |  |  |  |  |
| Nowalk 2001                             |  |  |  |  |  |  |  |
| Pahor 2006                              |  |  |  |  |  |  |  |
| Pahor 2014 / Gill 2016-BMJ / Marsh 2016 |  |  |  |  |  |  |  |
| Park 2008                               |  |  |  |  |  |  |  |
| Patil 2015/Uusi 2015                    |  |  |  |  |  |  |  |
| Pitkala 2013                            |  |  |  |  |  |  |  |
| Prescott 2008                           |  |  |  |  |  |  |  |
| Reinsch 1992                            |  |  |  |  |  |  |  |
| Rejeski 2017                            |  |  |  |  |  |  |  |
| Rolland 2007                            |  |  |  |  |  |  |  |
| Sherrington 2014                        |  |  |  |  |  |  |  |
| Suzuki 2012                             |  |  |  |  |  |  |  |
| Underwood 2013                          |  |  |  |  |  |  |  |
| Van Uffelen 2008                        |  |  |  |  |  |  |  |
| Villareal 2011                          |  |  |  |  |  |  |  |
| von Stengel 2011                        |  |  |  |  |  |  |  |
| Voukelatos 2015                         |  |  |  |  |  |  |  |
| Winters-Stone 2011                      |  |  |  |  |  |  |  |
| Wolf 2003                               |  |  |  |  |  |  |  |
| Woo 2007                                |  |  |  |  |  |  |  |

Legend: Low risk Unclear risk High risk

## Appendix 5. Description of the exercise interventions

| Study                    | Exercise Intervention Used for Comparisons                                   | Exercise Frequency (times/week)/intensity | Exercise Compliance (%) | Exercise session duration (min) | Control group used for comparisons |
|--------------------------|------------------------------------------------------------------------------|-------------------------------------------|-------------------------|---------------------------------|------------------------------------|
| <b>Belardinelli 2012</b> | Aerobic                                                                      | 3x/week<br>Moderate intensity             | 88                      | 60                              | Attention control                  |
| <b>Barnett 2003</b>      | Multicomponent (RT, aerobic, balance and coordination)                       | 2x per week<br>Moderate intensity         | 62                      | 60                              | Usual care                         |
| <b>Bunout 2005</b>       | Multicomponent (RT and aerobic)                                              | 2x per week<br>Moderate intensity         | 52                      | 60                              | Unclear (but probably usual care)  |
| <b>O'Connor 2009</b>     | Aerobic                                                                      | 5x per week<br>Moderate intensity         | Unclear                 | 40                              | Usual care                         |
| <b>Campbell 1997</b>     | Multicomponent (RT and balance exercise)                                     | 3x per week<br>Moderate intensity         | Unclear                 | 30                              | Attention control                  |
| <b>Dangour 2011</b>      | Resistance training                                                          | 2x per week<br>Moderate intensity         | 38                      | 60                              | Usual care                         |
| <b>El-Khoury 2015</b>    | Multicomponent (RT, balance exercise and behavioural changes)                | 2x per week<br>Moderate intensity         | 46.6                    | 60                              | Active control                     |
| <b>Galvao 2014</b>       | Multicomponent (aerobic exercise + RT)                                       | 4x/week<br>Moderate intensity             | 77                      | >20                             | Active control                     |
| <b>Gianoudis 2014</b>    | Multicomponent (RT and balance)                                              | 3x per week<br>Vigorous intensity         | 59                      | Unclear                         | Usual care                         |
| <b>Hambrecht 2004</b>    | Aerobic                                                                      | 5x per week<br>Moderate intensity         | 70                      | 28                              | Stent angioplasty                  |
| <b>Hewitt 2018</b>       | Resistance training                                                          | 2x per week<br>Moderate intensity         | 60                      | 45                              | Usual care                         |
| <b>Karinkanta 2007</b>   | Resistance training                                                          | 3x per week<br>Vigorous intensity         | 74                      | 45                              | Usual care                         |
| <b>Kemmler 2010</b>      | Multicomponent (RT, aerobic and balance)                                     | 4x per week<br>Vigorous intensity         | 59                      | 40                              | Active control                     |
| <b>King 2012</b>         | Aerobic                                                                      | 4x per week<br>Moderate intensity         | 73.4                    | 30-40                           | Nutrition education                |
| <b>Kovacs 2013</b>       | Multicomponent (RT, aerobic and balance)                                     | 3x per week<br>Moderate intensity         | Unclear                 | Unclear                         | Usual care                         |
| <b>Lam 2012</b>          | Tai-Chi                                                                      | 3x per week<br>Moderate intensity         | Unclear                 | 30                              | Active control                     |
| <b>Lam 2015</b>          | Multicomponent (stretching, aerobic, Tai-Chi)                                | 3x per week<br>Moderate intensity         | 75                      | 60                              | Active control                     |
| <b>Lord 1995</b>         | Multicomponent (RT, aerobic, flexibility, hand-eye coordination and balance) | 2x per week<br>Unclear intensity          | 73.2                    | 60                              | Unclear, probably usual care       |
| <b>Lord 2003</b>         | Multicomponent (RT, aerobic, flexibility, hand-                              | 2x per week<br>Moderate intensity         | 42.3                    | 60                              | Usual care and active control      |



|                         |                                                                                    |                                     |         |         |                   |
|-------------------------|------------------------------------------------------------------------------------|-------------------------------------|---------|---------|-------------------|
|                         | eye coordination and balance)                                                      |                                     |         |         |                   |
| <b>Liu-Ambrose 2010</b> | Resistance training                                                                | 2x per week<br>Vigorous intensity   | 70.3    | 60      | Active control    |
| <b>MacRae 1994</b>      | Multicomponent (RT and balance)                                                    | 3x per week<br>Moderate intensity   | Unclear | 60      | Attention control |
| <b>Merom 2015</b>       | Dance                                                                              | 2x per week<br>Unclear intensity    | 56      | 60      | Usual care        |
| <b>Messier 2013</b>     | Multicomponent (aerobic + RT) with diet                                            | 3x per week<br>Moderate intensity   | 58      | 60      | Active control    |
| <b>Munro 2004</b>       | Multicomponent (RT, aerobic, joint mobility, balance flexibility and coordination) | 2x per week<br>Moderate intensity   | Unclear | 45      | Usual care        |
| <b>Muscari 2010</b>     | Aerobic                                                                            | 3x per week<br>Moderate intensity   | Unclear | 60      | Active control    |
| <b>Mustata 2011</b>     | Aerobic                                                                            | 4x week<br>Unclear intensity        | Unclear | 60      | Usual care        |
| <b>Nowalk 2001</b>      | Multicomponent (RT, aerobic and flexibility)                                       | 3x per week<br>Unclear intensity    | 45      | Unclear | Active control    |
| <b>Pahor 2006</b>       | Multicomponent (RT, aerobic and balance)                                           | 4.7x per week<br>Moderate intensity | 78.7    | 50      | Active control    |
| <b>Pahor 2014</b>       | Multicomponent (RT, aerobic and balance)                                           | 5x per week<br>Moderate intensity   | 63      | 50      | Active control    |
| <b>Park 2008</b>        | Multicomponent (RT, aerobic and balance)                                           | 3x per week<br>Moderate intensity   | Unclear | 60      | Usual care        |
| <b>Patil 2015</b>       | Multicomponent (RT, balance and mobility)                                          | 1.5x per week<br>Moderate intensity | 73      | Unclear | Usual care        |
| <b>Pitkala 2013</b>     | Multicomponent (Individual needs for improvement in mobility)                      | 2x per week<br>Moderate intensity   | 81      | 60      | Usual care        |
| <b>Prescott 2008</b>    | Multicomponent (aerobic + RT)                                                      | Unclear<br>Moderate intensity       | Unclear | Unclear | Usual care        |
| <b>Reinsch 1992</b>     | Multicomponent (RT and balance)                                                    | 3x per week<br>Moderate intensity   | Unclear | 60      | Attention control |
| <b>Rejeski 2017</b>     | Resistance training                                                                | 4x per week<br>Vigorous intensity   | 85.7    | 45      | Active control    |
| <b>Rolland 2007</b>     | Multicomponent (RT, aerobic, balance and flexibility)                              | 2x per week<br>Moderate intensity   | 33.2    | 60      | Usual care        |
| <b>Sherrington 2014</b> | Multicomponent (RT and balance)                                                    | 6x per week<br>Unclear intensity    | 58.3    | 25      | Active control    |
| <b>Suzuki 2012</b>      | Multicomponent (RT, aerobic and balance)                                           | 2x per week<br>Moderate intensity   | 79.2    | 90      | Active control    |
| <b>Underwood 2013</b>   | Multicomponent (aerobic + RT)                                                      | 2x per week<br>Moderate intensity   | 54      | 45      | Active control    |
| <b>Van Uffelen 2008</b> | Aerobic (walking program)                                                          | 2x per week<br>Moderate intensity   | 63      | 60      | Active control    |

|                          |                                            |                                                                        |         |              |                   |
|--------------------------|--------------------------------------------|------------------------------------------------------------------------|---------|--------------|-------------------|
| <b>Villareal 2011</b>    | Multicomponent (aerobic +RT + flexibility) | 3x per week<br>Moderate intensity aerobic<br>Vigorous intensity for RT | 88      | 90           | Active control    |
| <b>Von Stengel 2011</b>  | Multicomponent (aerobic + RT)              | 4x per week<br>Vigorous intensity                                      | 59      | 35           | Active control    |
| <b>Voukelatos 2015</b>   | Aerobic (walking)                          | Unclear<br>Moderate intensity                                          | Unclear | 150 min/week | Attention control |
| <b>Winter-Stone 2011</b> | Resistance training                        | 3x per week<br>Moderate intensity                                      | 57      | 52.5         | Active control    |
| <b>Wolf 2003</b>         | Tai-chi                                    | 2x per week<br>Moderate intensity                                      | 76      | 30           | Active controls   |
| <b>Woo 2007</b>          | Tai-chi                                    | 3x per week<br>Moderate intensity                                      | 81      | Unclear      | Usual care        |

## Appendix 6. Meta-analyses and meta-regressions for the outcome “Mortality”

### Funnel Plot

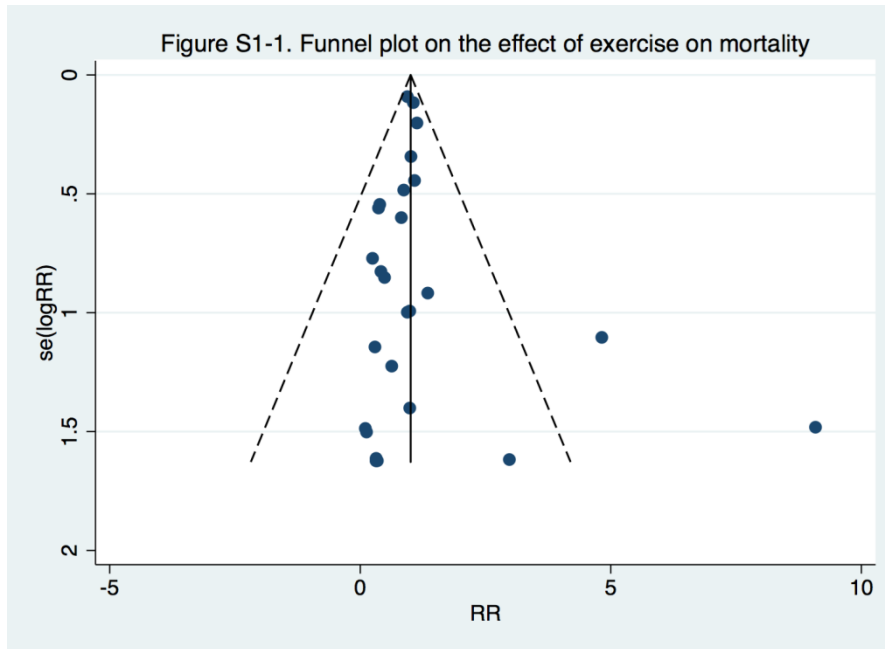

### Sensitivity Analysis 1. Including studies with very low exercise compliance

Figure S2. Effect of exercise on mortality, including Dangour 2011 & Munro 2004

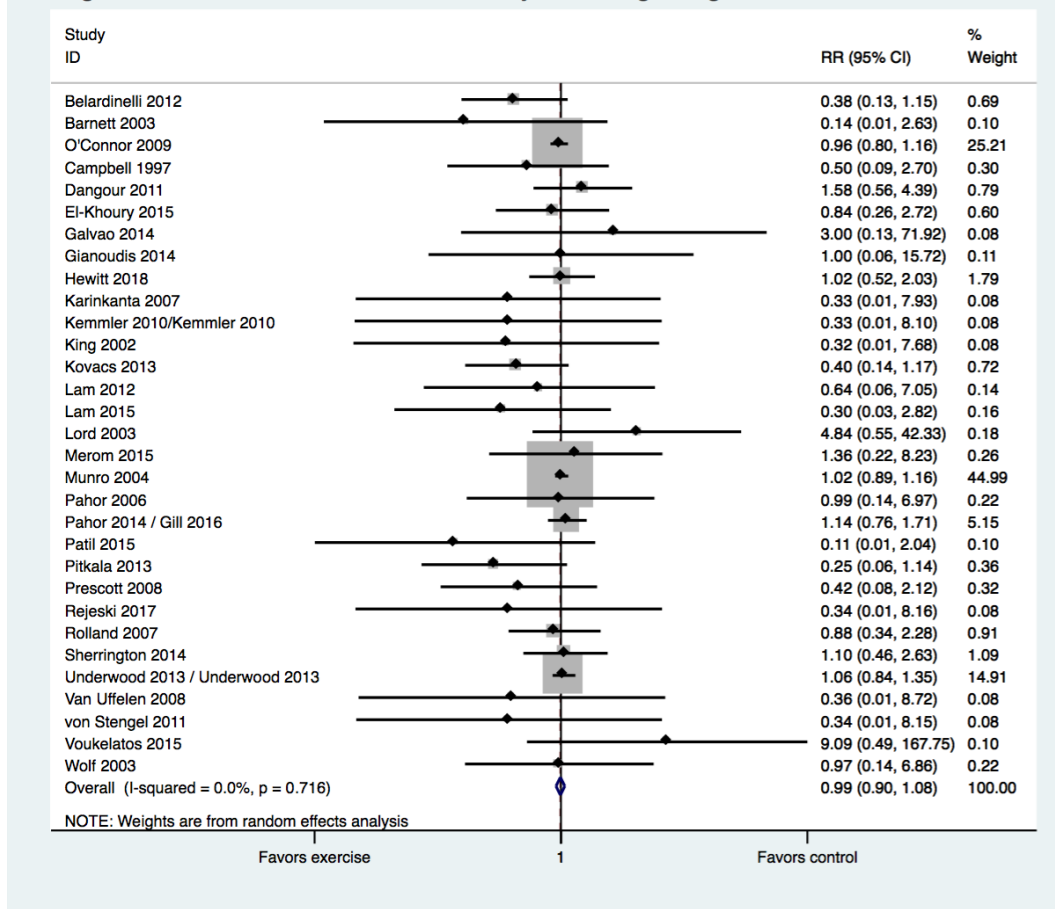

RR (95% CI): 0.988 (0.90-1.08), p=0.799

I<sup>2</sup>=0.0%

### Sensitivity Analysis 2. Using a fixed-effects model

Figure S3. Effect of exercise on mortality, fixed-effect model

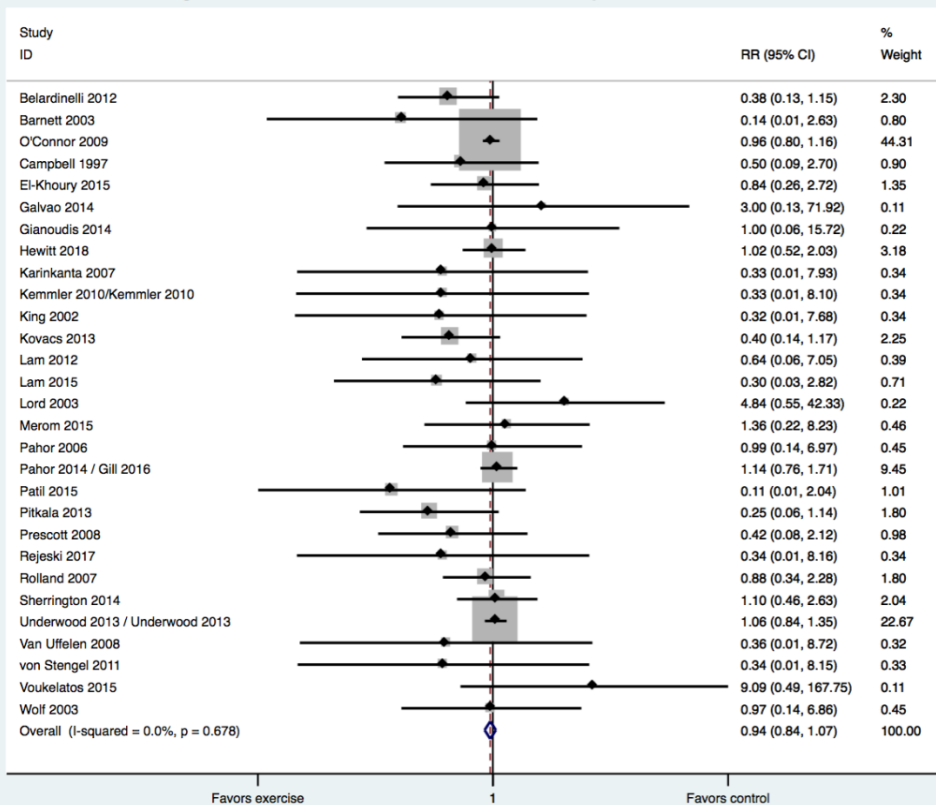

RR (95% CI): 0.945 (0.84-1.07),  $p=0.365$   
 $I^2=0.0\%$

### Sensitivity Analysis 3. Excluding cluster-RCTs with no adjustments for the design effect

Figure S4. Effect of exercise on mortality, excluding cluster RCTs with no design effect

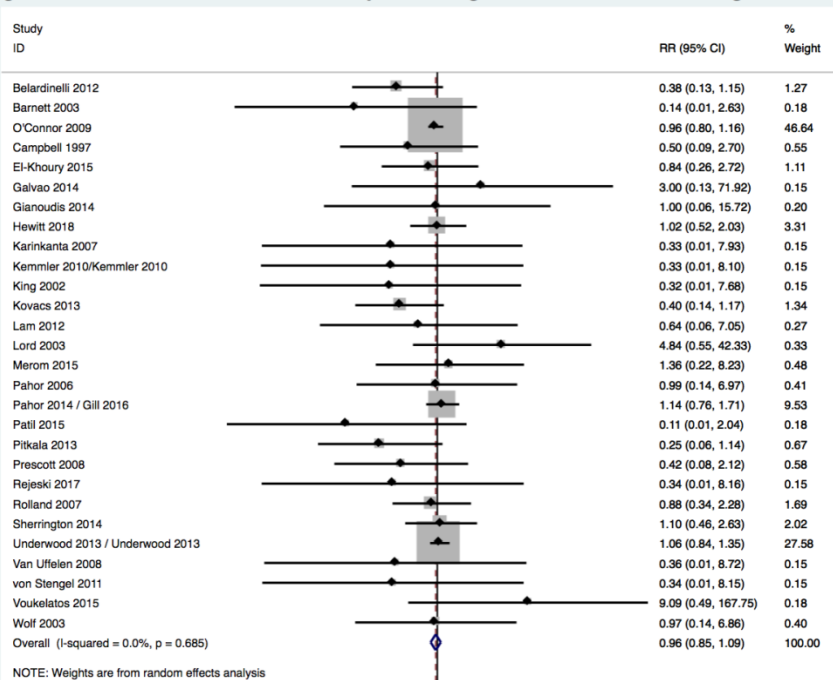

RR (95% CI): 0.963 (0.85-1.09),  $p=0.552$

$I^2=0.0\%$

**Sensitivity Analysis 4. Excluding studies in which the population had a mean age < 60 years**

Figure S5. Effect of exercise on mortality in studies including people aged  $\geq 60$  years old

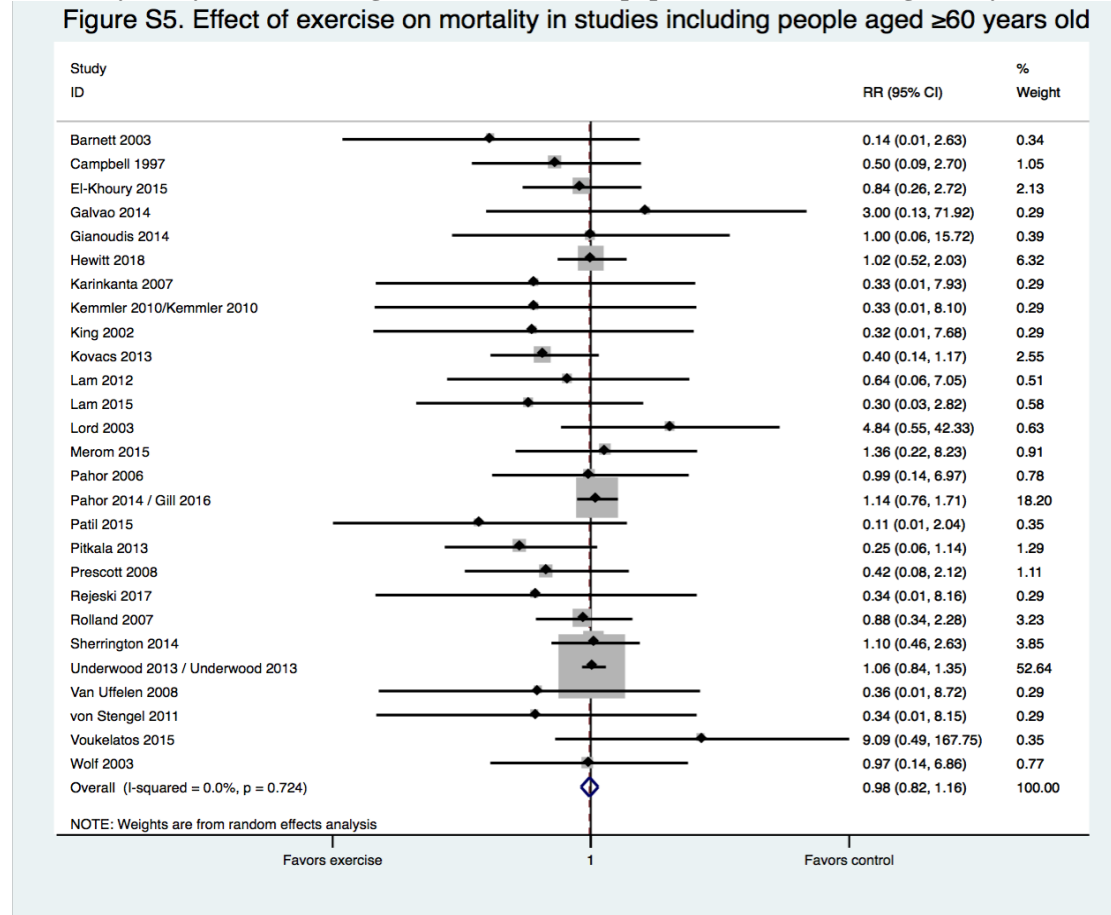

RR (95% CI): 0.977 (0.82-1.16),  $p=0.789$

$I^2=0.0\%$

**Sensitivity Analysis 5. Restricted to studies larger than the median (>203 participants)**

Figure S6. Effect of exercise on mortality in studies with >203 subjects

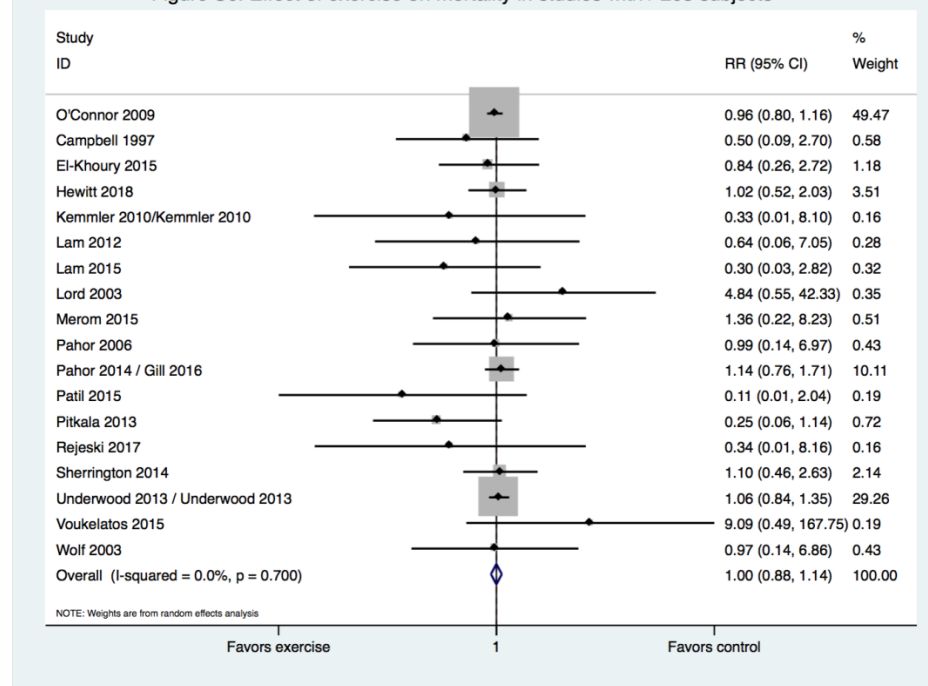

RR (95% CI): 0.999 (0.88-1.14), p=0.986  
 I<sup>2</sup>=0.0%

**Sensitivity Analysis 6. Restricted to studies with a low risk of attrition bias**

Figure S7. Effect of exercise on mortality in studies with low risk of attrition

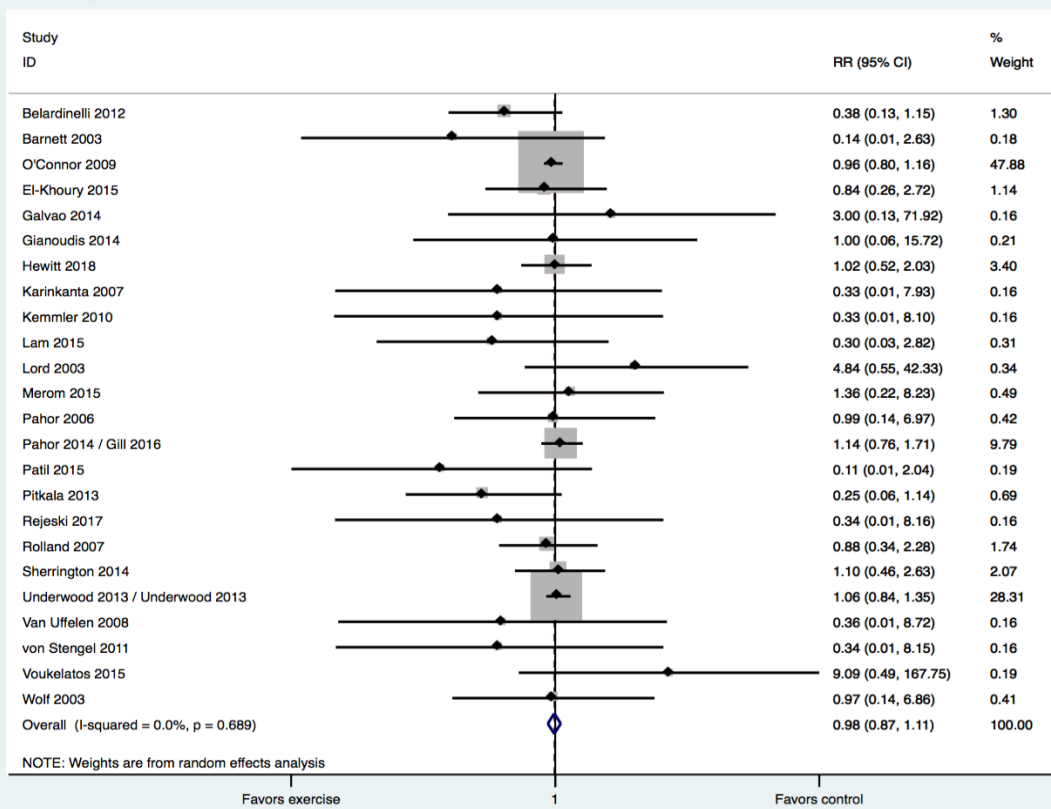

RR (95% CI): 0.982 (0.87-1.11), p=0.781  
 I<sup>2</sup>=0.0%

**Sub-group Analysis 1. Restricted to non-clinically/disease-specific studies**

Figure S8. Effect of exercise on mortality in non-clinically specific population

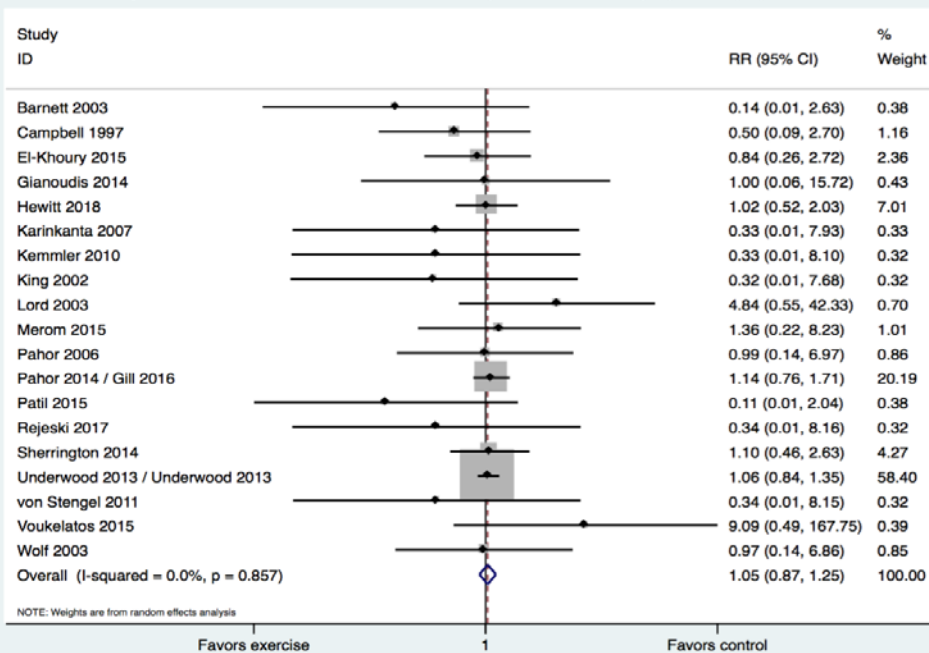

RR (95% CI): 1.05 (0.87-1.25), p=0.623  
 I<sup>2</sup>=0.0%

**Sub-group Analysis 2. Restricted to clinically/disease-specific studies**

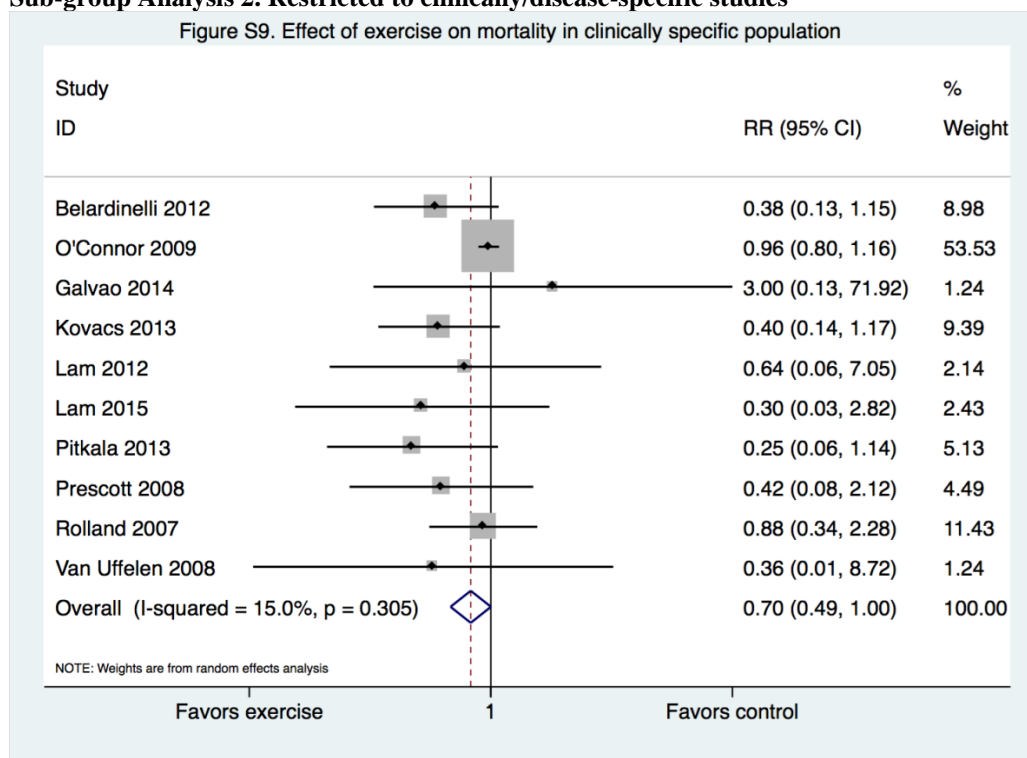

RR (95% CI): 0.701 (0.49-1.00), p=0.051  
 I<sup>2</sup>=15.0%

**Table S-1. Meta-regression on the association between mortality and exercise-related variables**

| Meta-regression                                            | Categories                 | Exp (b) (SE) | p-value |
|------------------------------------------------------------|----------------------------|--------------|---------|
| Exercise frequency (n=29)                                  | <2x/week (ref)             |              |         |
|                                                            | 3x/week                    | 0.42 (0.14)  | 0.015   |
|                                                            | >3x/week                   | 0.98 (0.13)  | 0.88    |
| Effective frequency (n=23)                                 | <2x/week (ref)             |              |         |
|                                                            | Between 2-3x/week          | 0.35 (0.16)  | 0.028   |
|                                                            | >3x/week                   | 1.12 (0.23)  | 0.60    |
| Exercise volume (n=25)                                     | <120/min/week (ref)        |              |         |
|                                                            | Between 120-179 min/week   | 0.80 (0.21)  | 0.41    |
|                                                            | ≥180 min/week              | 0.92 (0.13)  | 0.56    |
| Effective volume (n=21)                                    | ≤60 min/week (ref)         |              |         |
|                                                            | Between 61-120 min/week    | 0.65 (0.21)  | 0.20    |
|                                                            | >120 min/week              | 0.91 (0.19)  | 0.65    |
| Exercise intensity (n=27)                                  | Moderate (ref)             |              |         |
|                                                            | Vigorous intensity         | 0.46 (0.32)  | 0.28    |
| Exercise type (multicomponent only as reference) (n=29)    | Multicomponent (ref)       |              |         |
|                                                            | Aerobic                    | 0.96 (0.76)  | 0.76    |
|                                                            | Strength                   | 0.34 (0.39)  | 0.36    |
|                                                            | Others (tai-chi and dance) | 1.03 (0.62)  | 0.96    |
| Exercise type (others vs. multicomponent + balance) (n=29) | Others (ref)               |              |         |
| Multicomponent + balance                                   | 0.92 (0.14)                | 0.58         |         |

Legend: Exp: exponential, SE: standard error

## Appendix 7. Meta-analyses and meta-regressions for the outcome “Number of people hospitalized”

### Funnel Plot

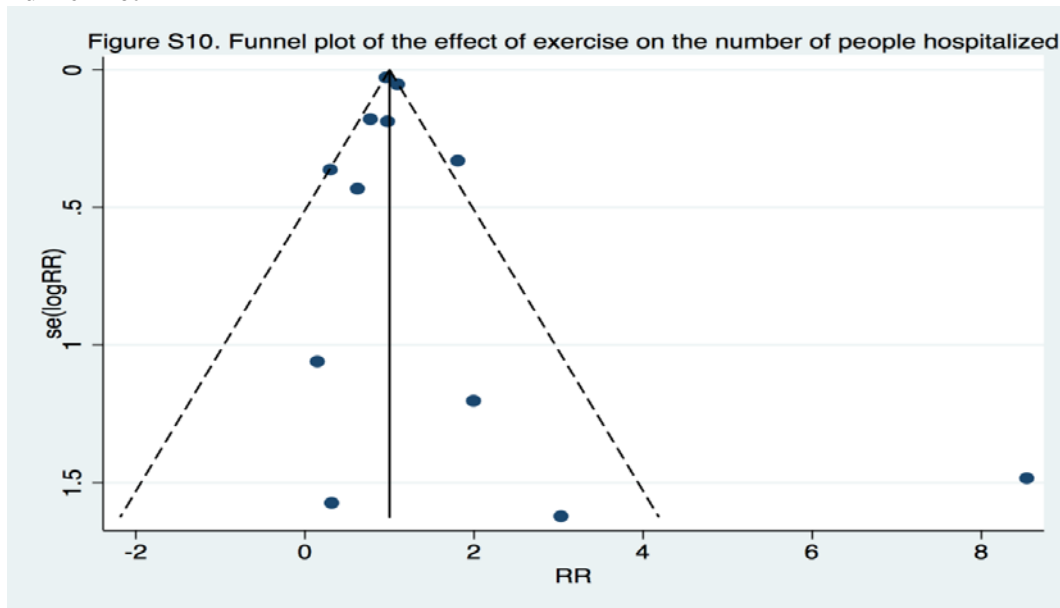

### Sensitivity Analysis 1. Including studies with very low exercise compliance

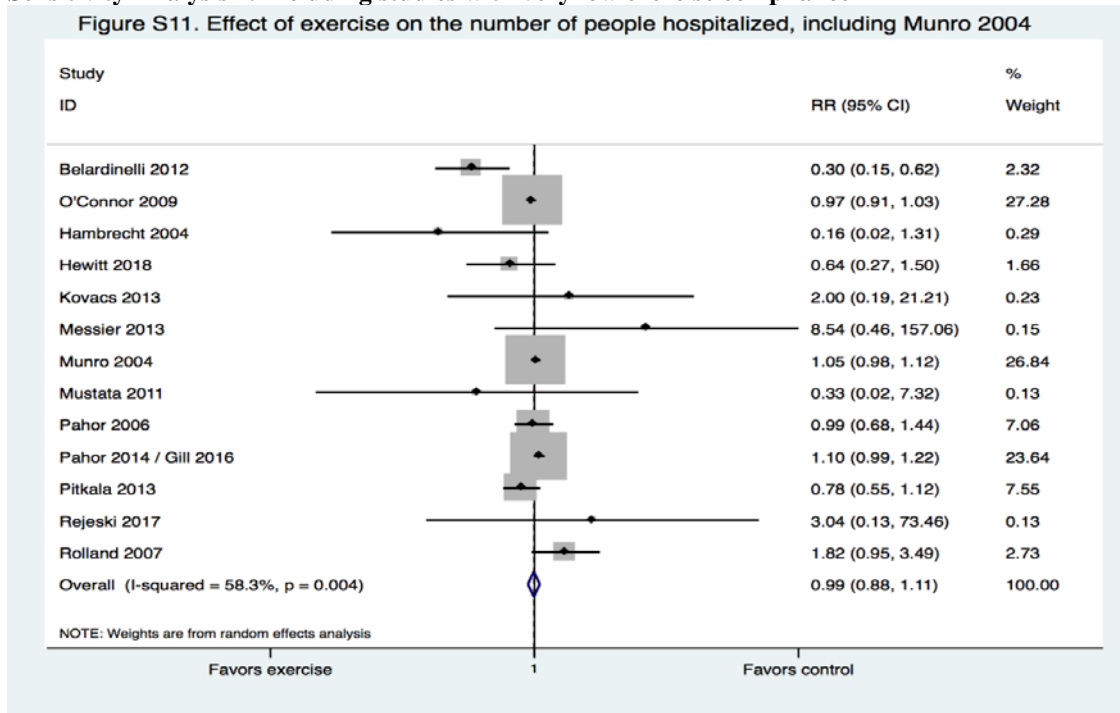

RR (95% CI): 0.989 (0.88-1.11), p=0.842  
 $I^2=58.3\%$



### Sensitivity Analysis 3. Excluding cluster-RCTs with no adjustments for the design effect

Figure S12. Effect of exercise on the number of people hospitalized in parallel group RCTs

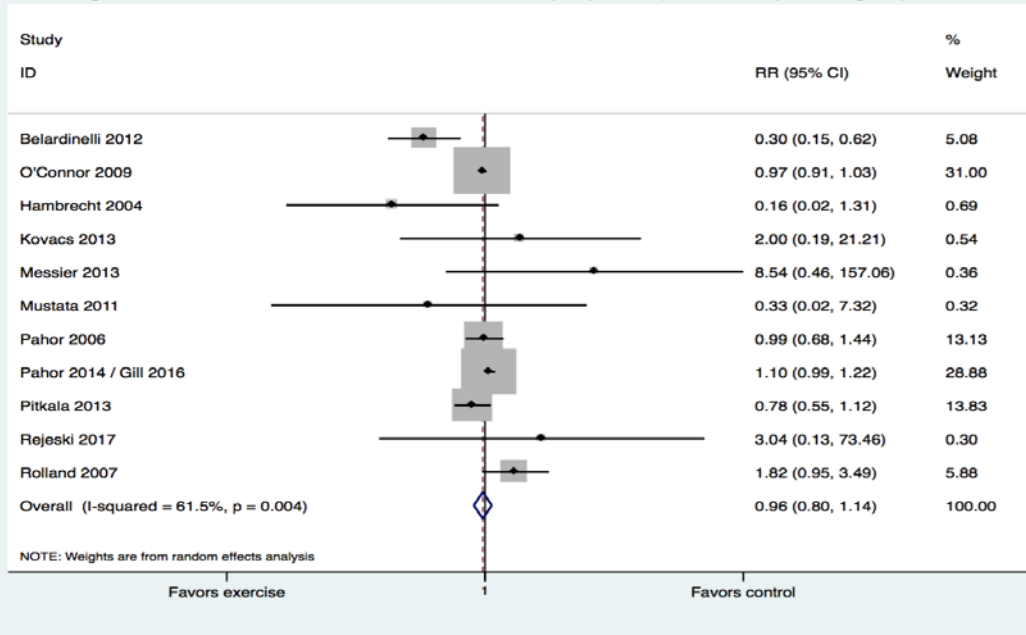

RR (95% CI): 0.957 (0.80-1.14), p=0.625  
 $I^2=61.5\%$

### Sensitivity Analysis 4. Excluding studies in which the population had a mean age < 60 years

Figure S13. Effect of exercise on the number of people ( $\geq 60$  yrs old) hospitalized

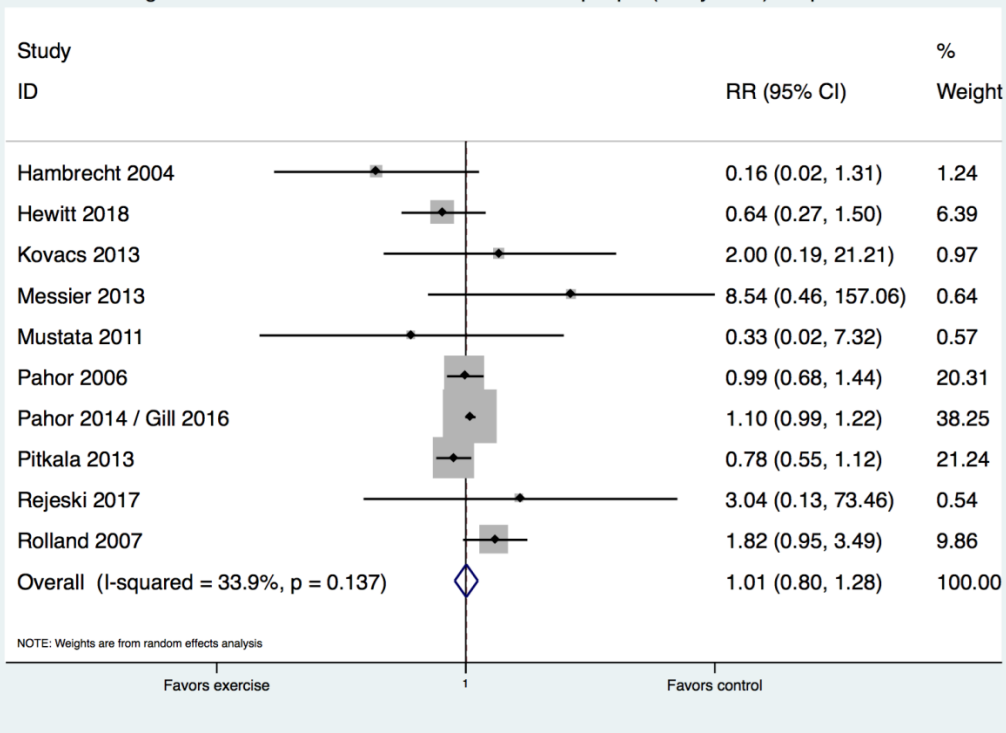

RR (95% CI): 1.01 (0.80-1.28), p=0.932  
 $I^2=33.9\%$

**Sensitivity Analysis 5. Restricted to studies larger than the median (>203 participants)**

Figure S14. Effect of exercise on the number of people hospitalized, studies with >203 subjects

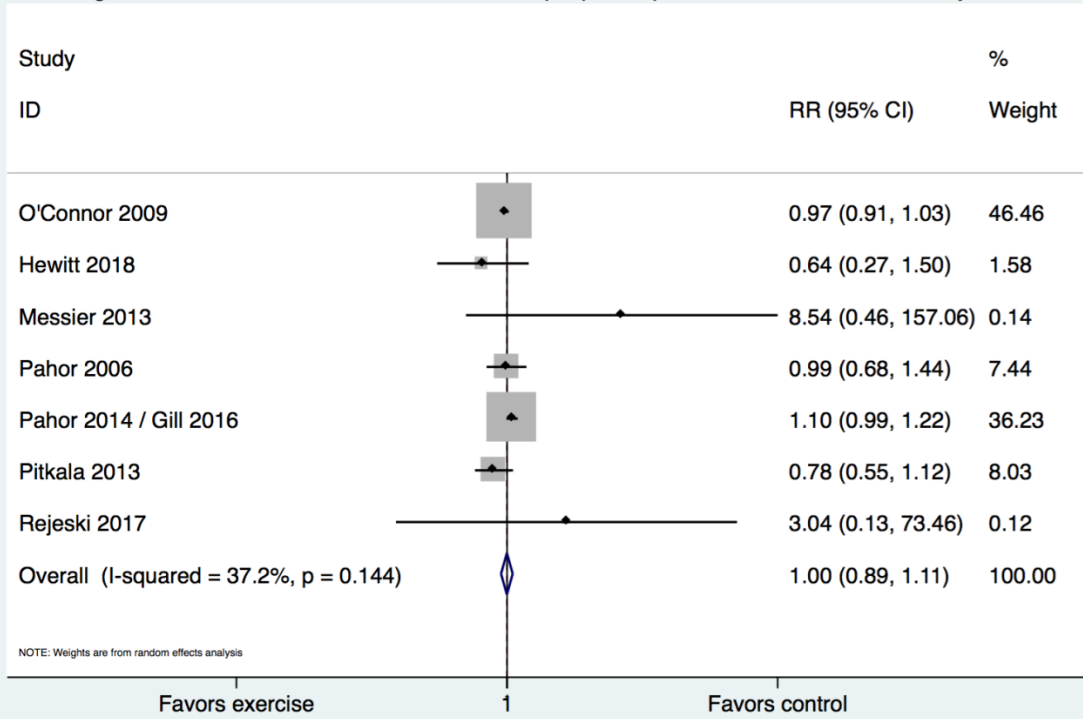

RR (95% CI): 0.997 (0.89-1.11), p=0.955  
 I<sup>2</sup>=37.2%

**Sensitivity Analysis 6. Restricted to studies with a low risk of attrition bias**

Figure S15. Effect of exercise on the number of people hospitalized, studies with low risk of attrition

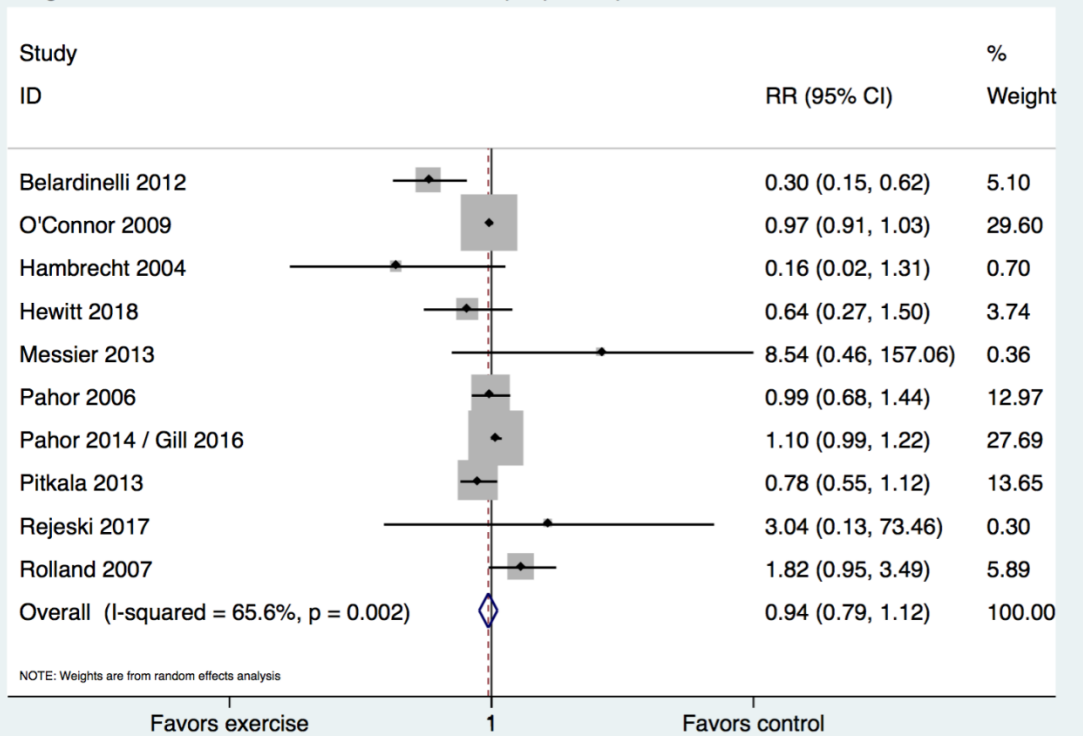

RR (95% CI): 0.941 (0.79-1.12), p=0.496  
 I<sup>2</sup>=65.6%

### Sub-group Analysis 1. Restricted to non-clinically/disease-specific studies

Figure S16. The effect of exercise on the number of people hospitalized in studies including non-disease population

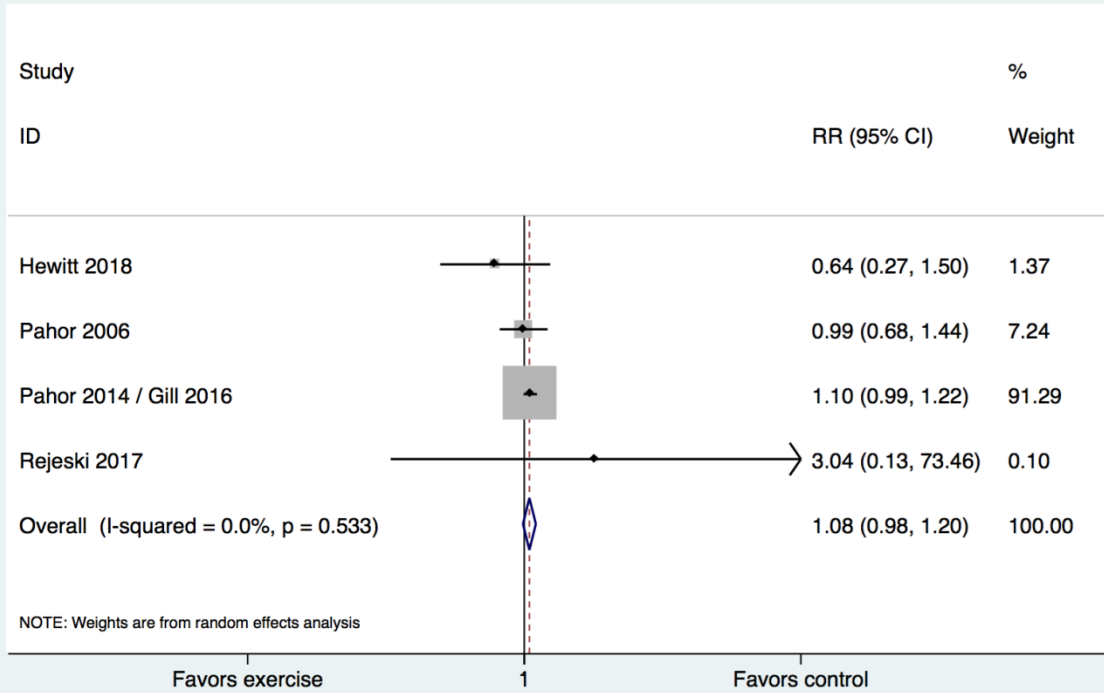

RR (95% CI): 1.08 (0.98-1.20), p=0.12  
I<sup>2</sup>=0.0%

### Sub-group Analysis 2. Restricted to clinically/disease-specific studies

Figure S17. Effect of exercise on the number of people hospitalized in studies with a disease specific condition

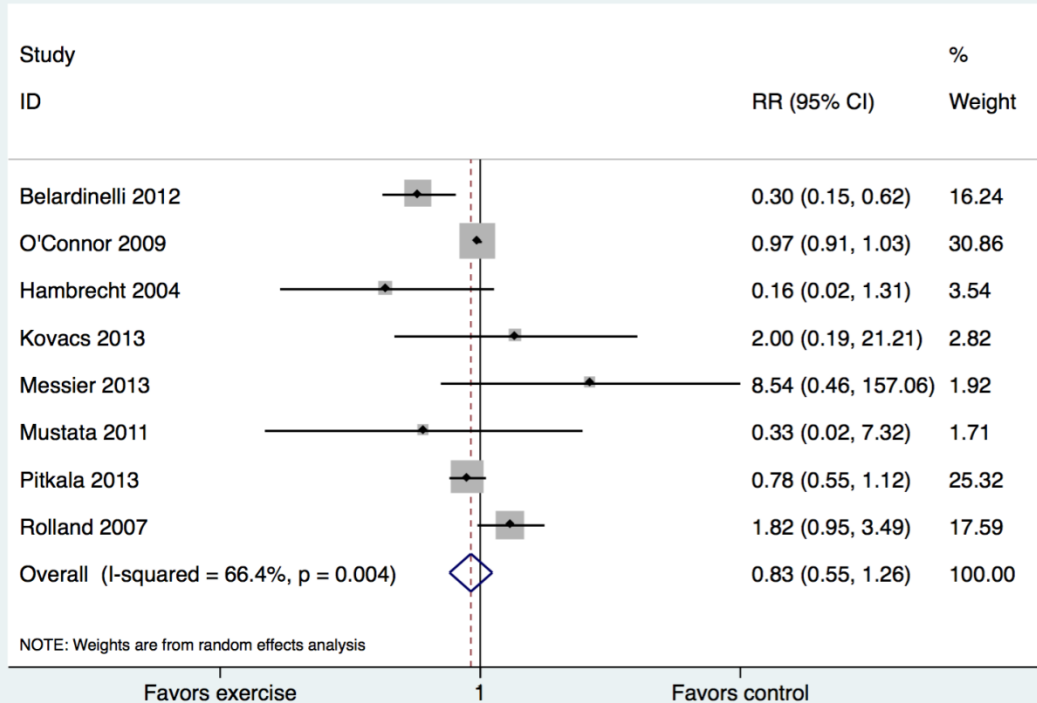

RR (95% CI): 0.83 (0.55-1.27), p=0.393  
I<sup>2</sup>=66.4%

**Table S2. Meta-regression on the association between the number of people hospitalized and exercise-related variables**

| Meta-regression                                            | Categories                 | Exp (b) (SE) | <i>p</i> -value |
|------------------------------------------------------------|----------------------------|--------------|-----------------|
| Exercise frequency (n=12)                                  | <2x/week (ref)             |              |                 |
|                                                            | 3x/week                    | 0.46 (0.24)  | 0.17            |
|                                                            | >3x/week                   | 1.10 (0.26)  | 0.67            |
| Effective frequency (n=9)                                  | <2x/week (ref)             |              |                 |
|                                                            | Between 2-3x/week          | 0.30 (0.18)  | 0.094           |
|                                                            | >3x/week                   | 1.01 (0.36)  | 0.98            |
| Exercise volume (n=11)                                     | <120/min/week (ref)        |              |                 |
|                                                            | Between 120-179 min/week   | 1.47 (1.21)  | 0.66            |
|                                                            | ≥180 min/week              | 1.37 (1.07)  | 0.69            |
| Effective volume (n=9)                                     | ≤60 min/week (ref)         |              |                 |
|                                                            | Between 61-120 min/week    | 0.68 (0.57)  | 0.66            |
|                                                            | >120 min/week              | 0.71 (0.50)  | 0.64            |
| Exercise intensity (n=11)                                  | Moderate (ref)             |              |                 |
|                                                            | Vigorous intensity         | 3.40 (6.7)   | 0.55            |
| Exercise type (multicomponent only as reference) (n=12)    | Multicomponent (ref)       |              |                 |
|                                                            | Aerobic                    | 0.96 (0.76)  | 0.76            |
|                                                            | Strength                   | 0.34 (0.39)  | 0.36            |
|                                                            | Others (tai-chi and dance) | 1.03 (0.62)  | 0.96            |
| Exercise type (others vs. multicomponent + balance) (n=12) | Others (ref)               |              |                 |
|                                                            | Multicomponent + balance   | 0.92 (0.14)  | 0.58            |

Legend: Exp: exponential, SE: standard error

## Appendix 8. Meta-analyses and meta-regressions for the outcome “Fallers”

### Funnel Plot

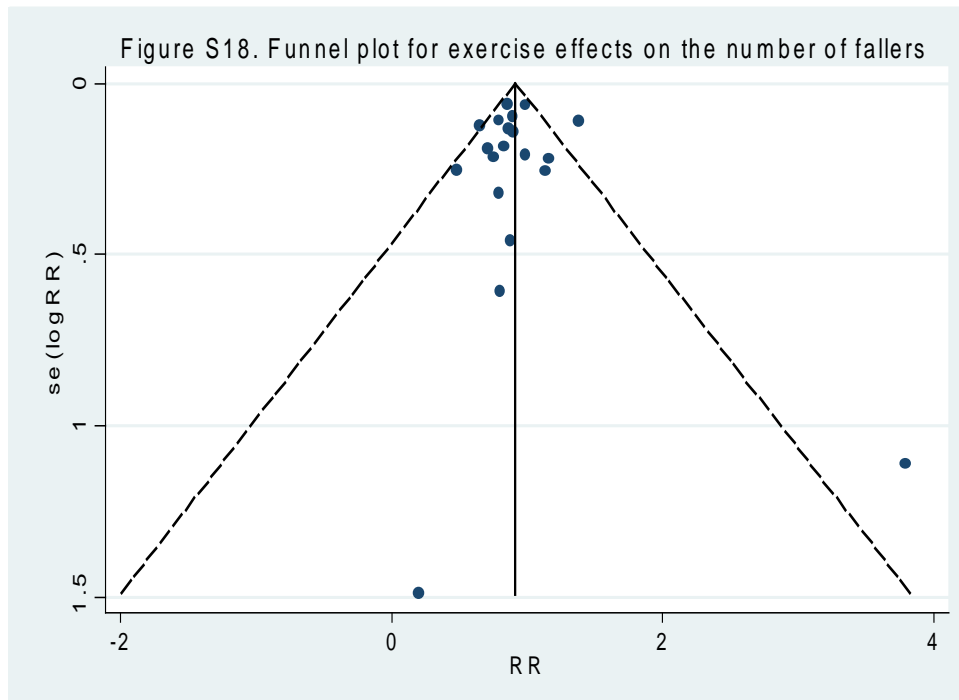

### Sensitivity Analysis 1. Including studies with very low exercise compliance

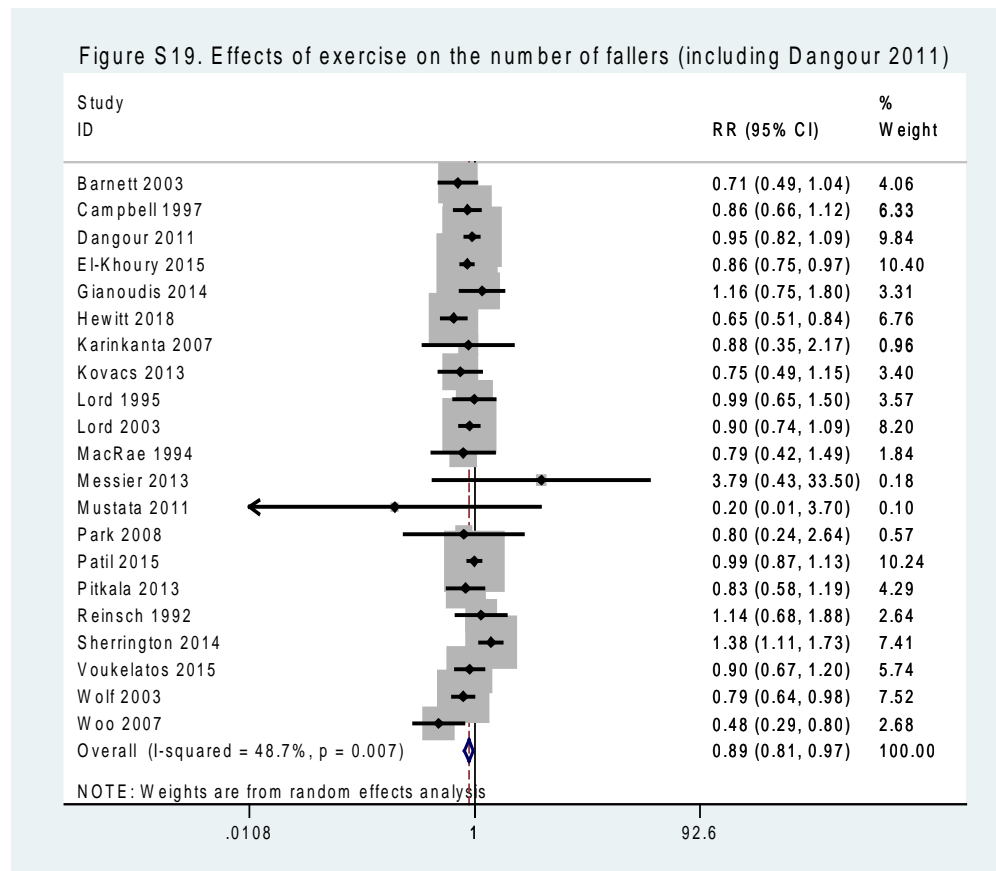

RR (95% CI): 0.89 (0.81-0.97), p=0.011  
 $I^2=48.7\%$

### Sensitivity Analysis 3. Excluding cluster-RCTs with no adjustments for the design effect

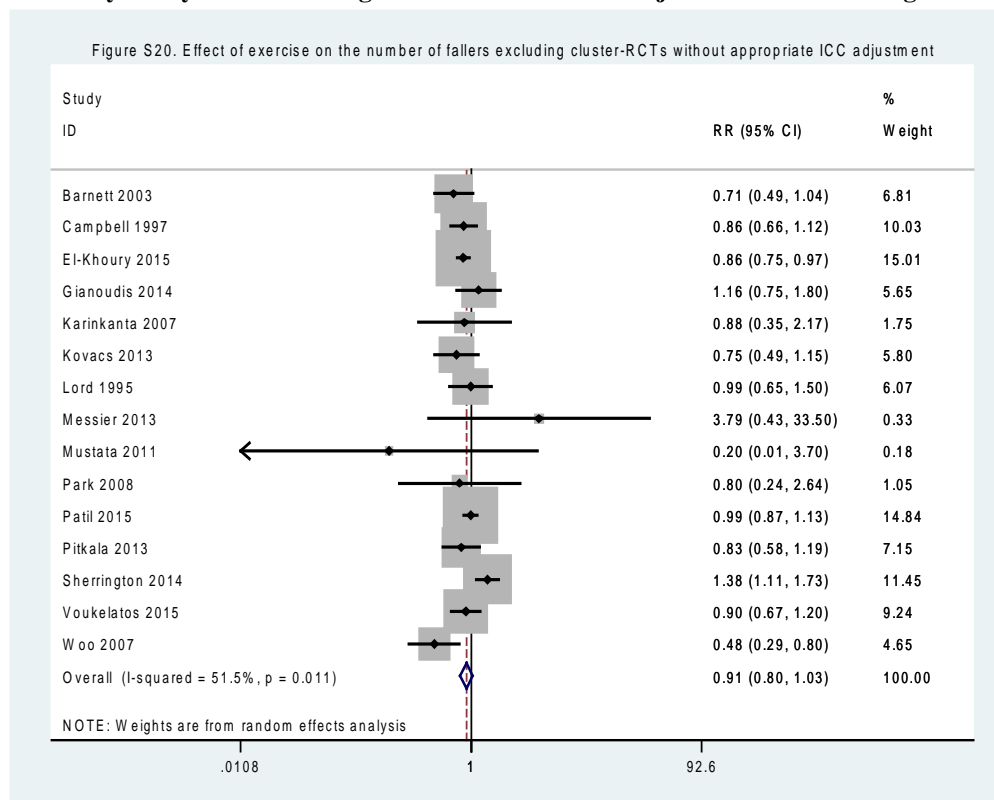

RR (95% CI): 0.91 (0.80-1.03), p=0.14  
 $I^2=51.5\%$

### Sensitivity Analysis 4. Excluding studies in which the population had a mean age < 60 years

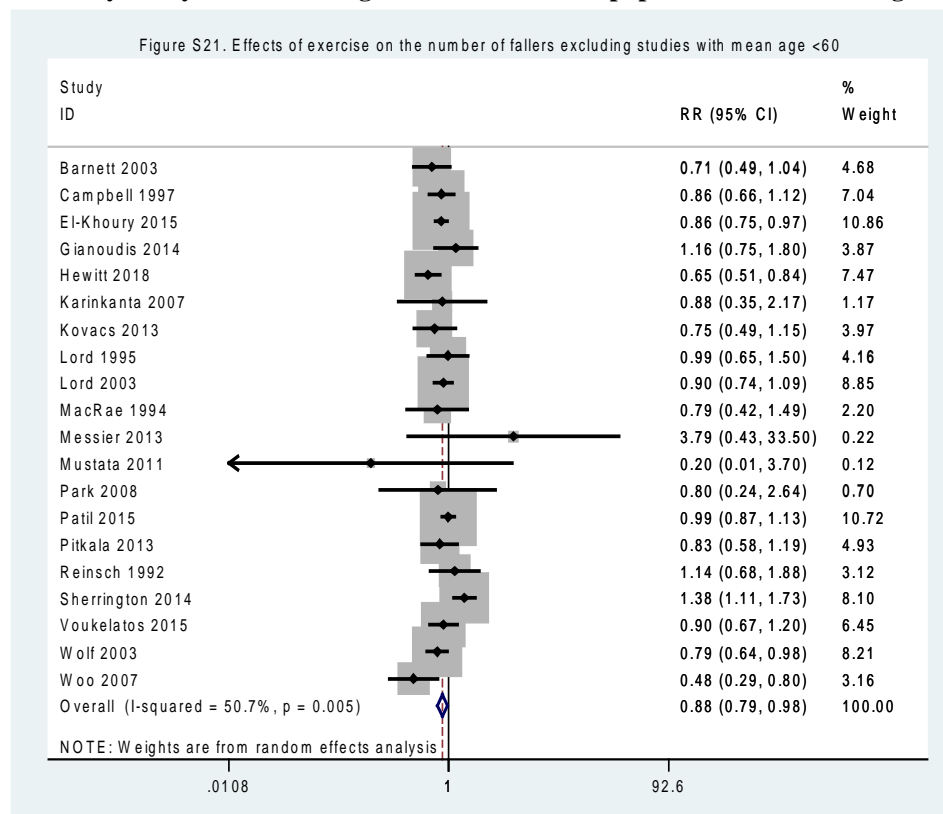

RR (95% CI): 0.88 (0.80-0.98), p=0.015  
 $I^2=50.7\%$

**Sensitivity Analysis 5. Restricted to studies larger than the median (>203 participants)**

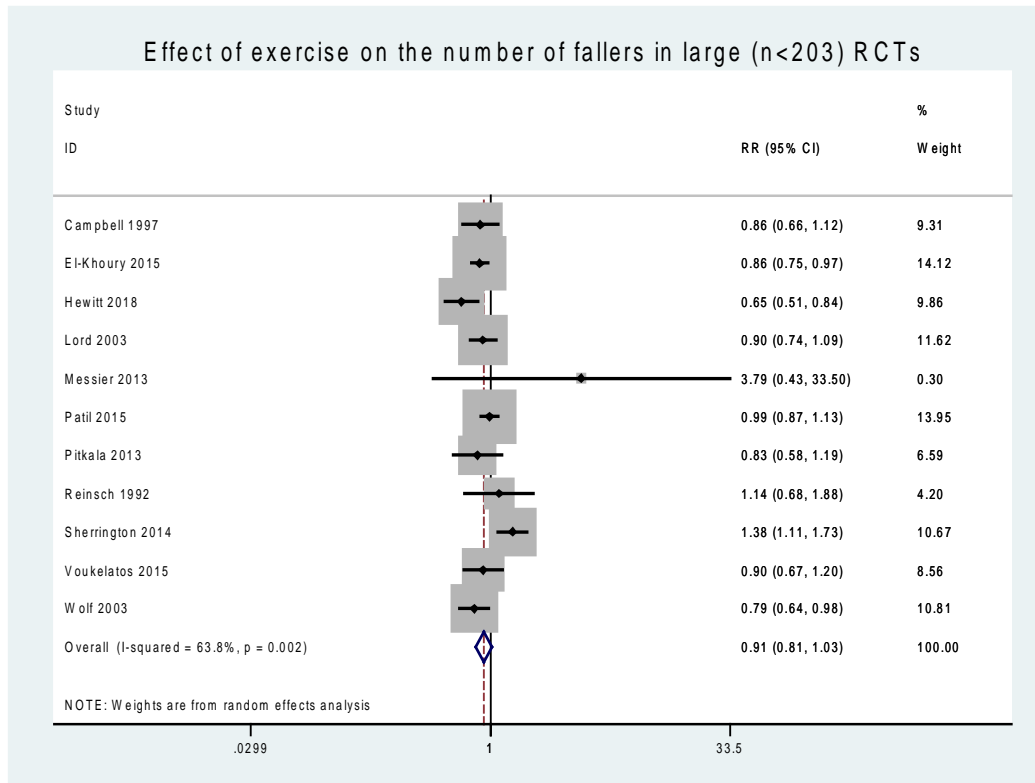

RR (95% CI): 0.91 (0.81-1.02), p=0.12  
 I<sup>2</sup>=63.8%

**Sensitivity Analysis 6. Restricted to studies with a low risk of attrition bias**

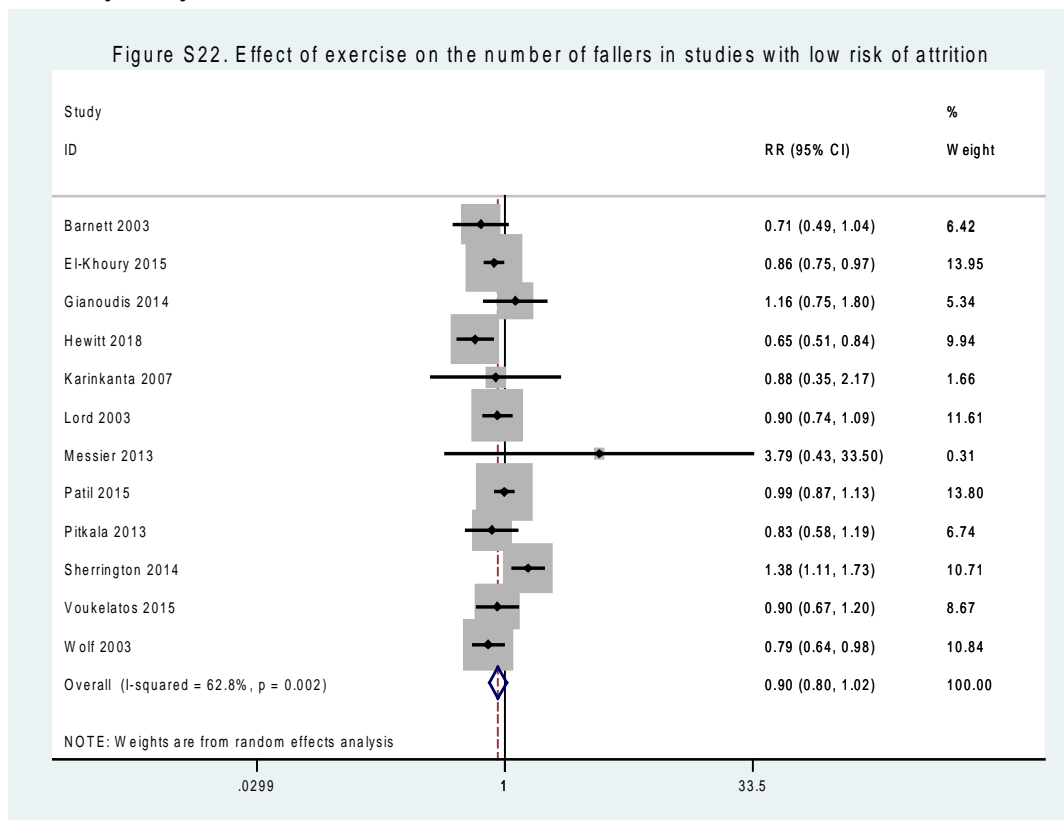

RR (95% CI): 0.90 (0.80-1.02), p=0.10  
 I<sup>2</sup>=62.8%

**Sub-group Analysis 1. Restricted to non-clinically/disease-specific studies**

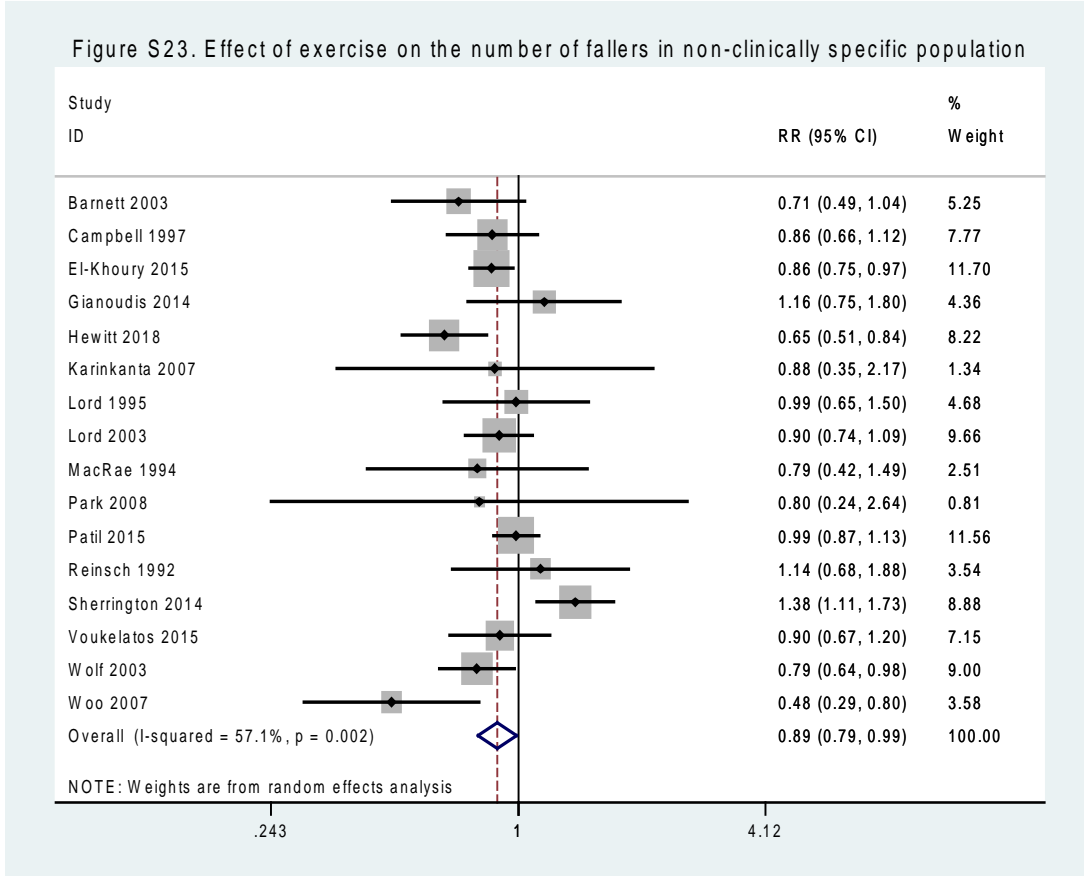

RR (95% CI): 0.89 (0.79-0.99), p=0.034  
 I<sup>2</sup>=57.1%

**Sub-group Analysis 2. Restricted to clinically/disease-specific studies**

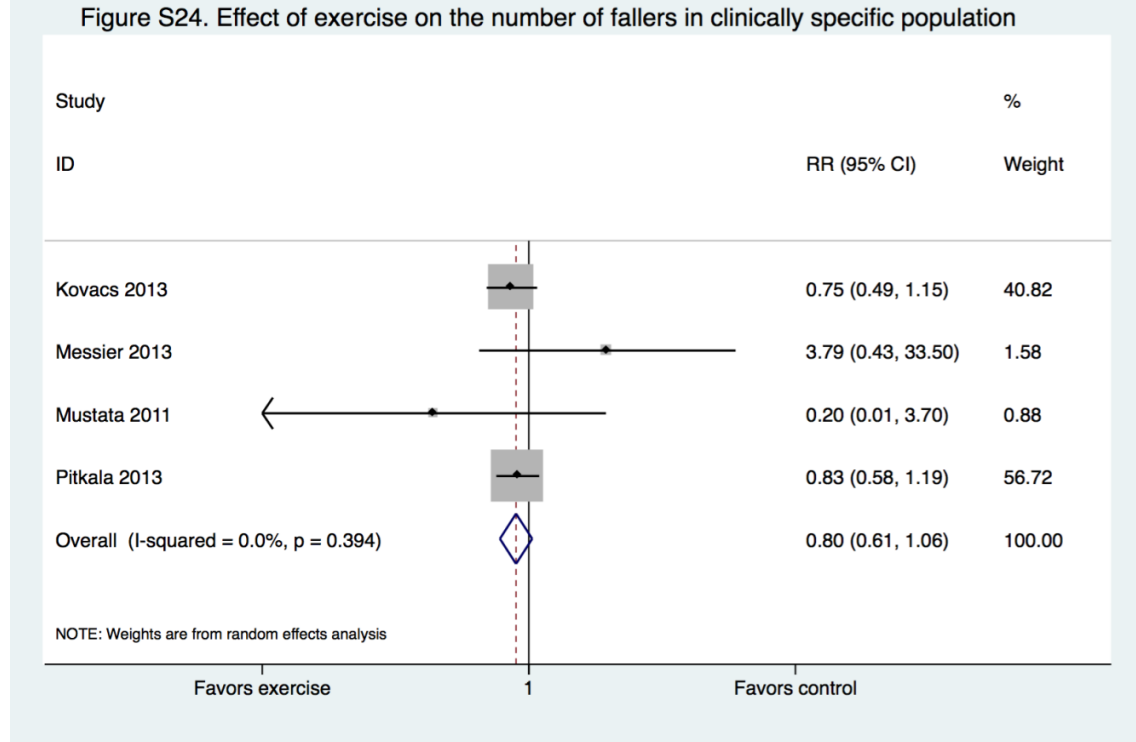

RR (95% CI): 0.81 (0.61-1.06), p=0.12  
 I<sup>2</sup>=0.0%



**Table S3. Meta-regression on the association between the risk of becoming a faller and exercise-related variables**

| Meta-regression                                                  | Categories                 | Exp (b) (SE) | <i>p</i> -value |
|------------------------------------------------------------------|----------------------------|--------------|-----------------|
| Exercise frequency<br>(n=20)                                     | <2x/week (ref)             |              |                 |
|                                                                  | 3x/week                    | 1.01 (0.12)  | 0.92            |
|                                                                  | >3x/week                   | 1.35 (0.19)  | 0.050           |
| Effective frequency<br>(n=13)                                    | <2x/week (ref)             |              |                 |
|                                                                  | Between 2-3x/week          | 0.65 (0.16)  | 0.12            |
|                                                                  | >3x/week                   | 1.60 (0.25)  | 0.014           |
| Exercise volume<br>(n=16)                                        | <120/min/week (ref)        |              |                 |
|                                                                  | Between 120-179 min/week   | 1.22 (0.16)  | 0.15            |
|                                                                  | ≥180 min/week              | 1.27 (0.30)  | 0.32            |
| Effective volume<br>(n=10)                                       | ≤60 min/week (ref)         |              |                 |
|                                                                  | Between 61-120 min/week    | 1.25 (0.19)  | 0.18            |
|                                                                  | >120 min/week              | No studies   |                 |
| Exercise intensity<br>(n=17)                                     | Moderate (ref)             |              |                 |
|                                                                  | Vigorous intensity         | 1.30 (0.28)  | 0.24            |
| Exercise type<br>(multicomponent only<br>as reference) (n=20)    | Multicomponent (ref)       |              |                 |
|                                                                  | Aerobic                    | 0.95 (0.22)  | 0.84            |
|                                                                  | Strength                   | 0.96 (0.48)  | 0.94            |
|                                                                  | Others (tai-chi and dance) | 0.75 (0.13)  | 0.12            |
| Exercise type (others<br>vs. multicomponent +<br>balance) (n=20) | Others (ref)               |              |                 |
|                                                                  | Multicomponent + balance   | 1.18 (0.16)  | 0.25            |

Legend: Exp: exponential, SE: standard error

## Appendix 9. Meta-analyses and meta-regressions for the outcome “Fallers with multiple falls”

### Funnel Plot

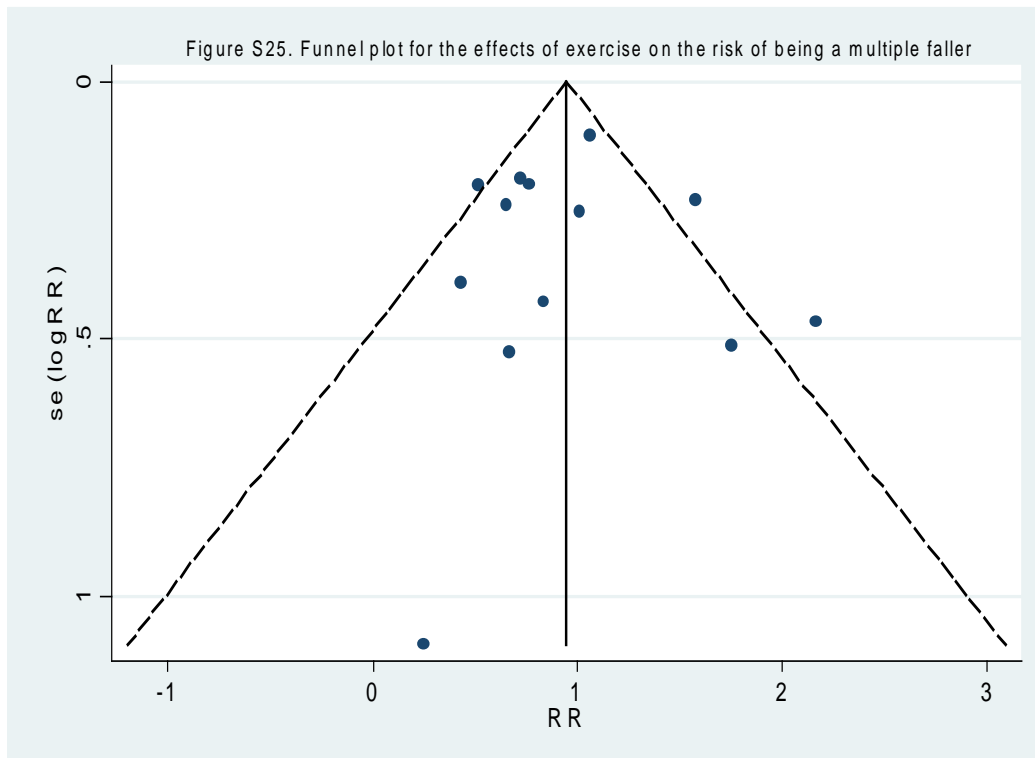

### Sensitivity Analysis 3. Excluding cluster-RCTs with no adjustments for the design effect

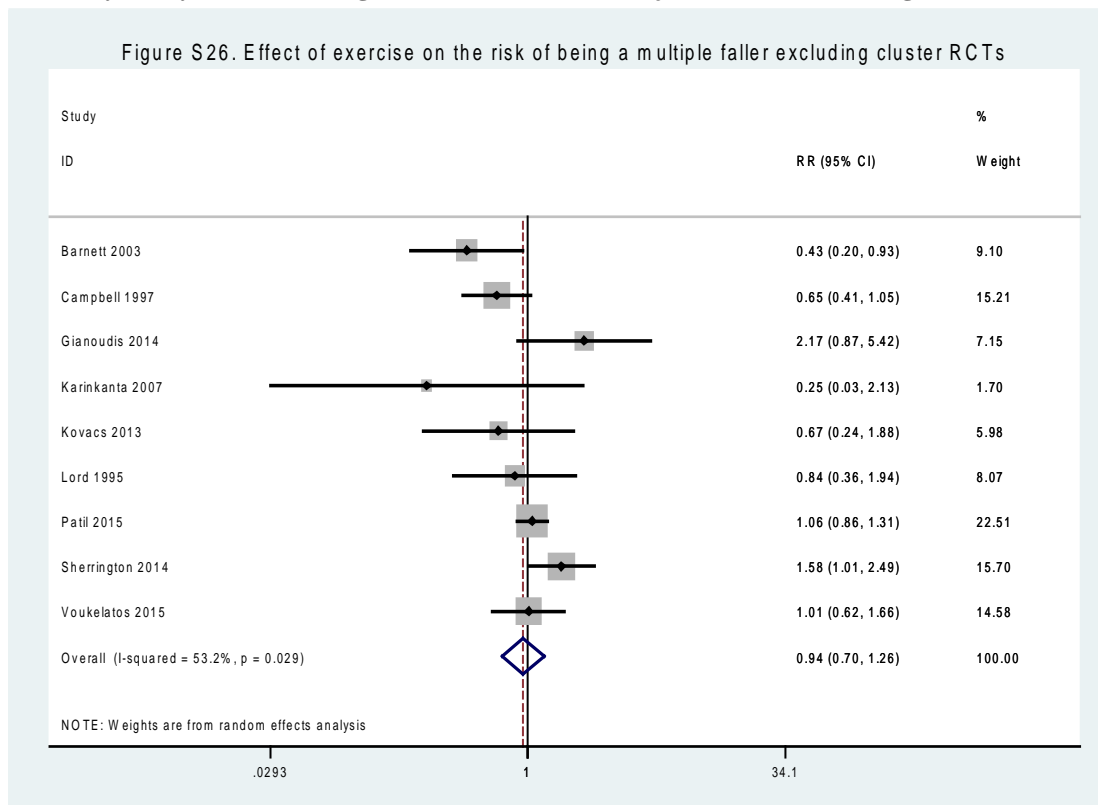

RR (95% CI): 0.94 (0.70-1.26), p=0.68  
 $I^2=53.2\%$

**Analysis 5. Restricted to studies larger than the median (>203 participants)**

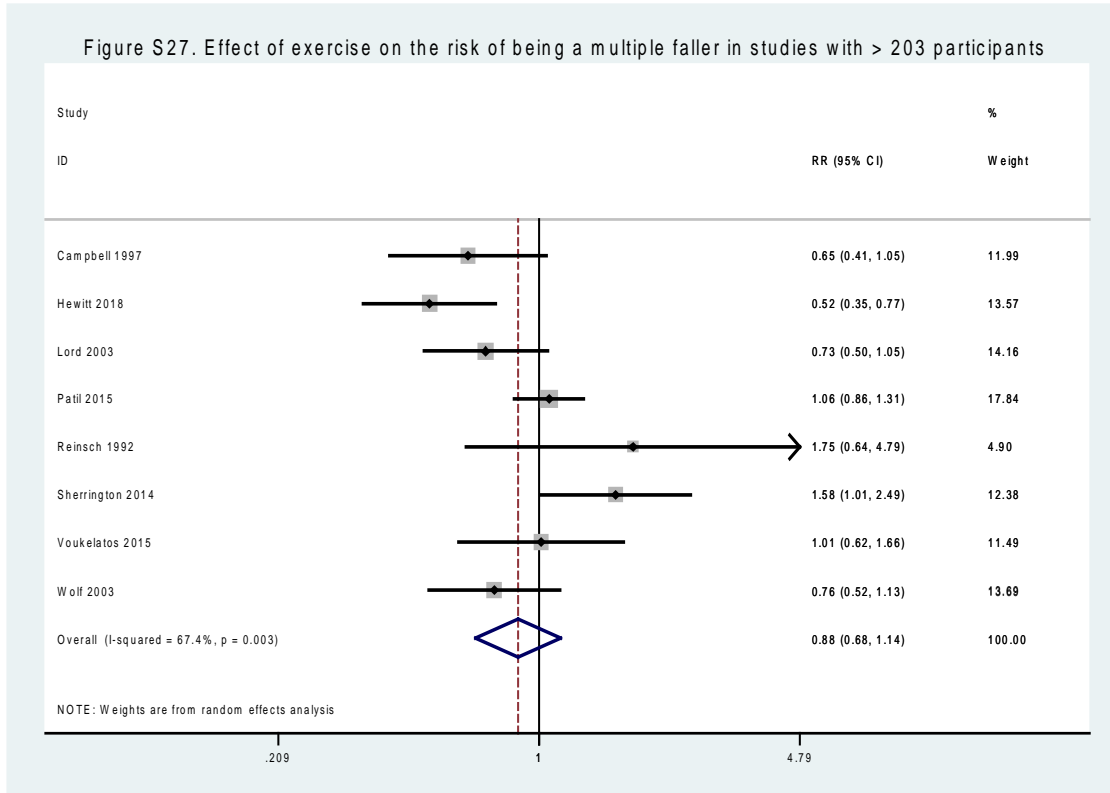

RR (95% CI): 0.88 (0.68-1.14), p=0.33  
 I<sup>2</sup>=67.4%

**Sensitivity Analysis 6. Restricted to studies with a low risk of attrition bias**

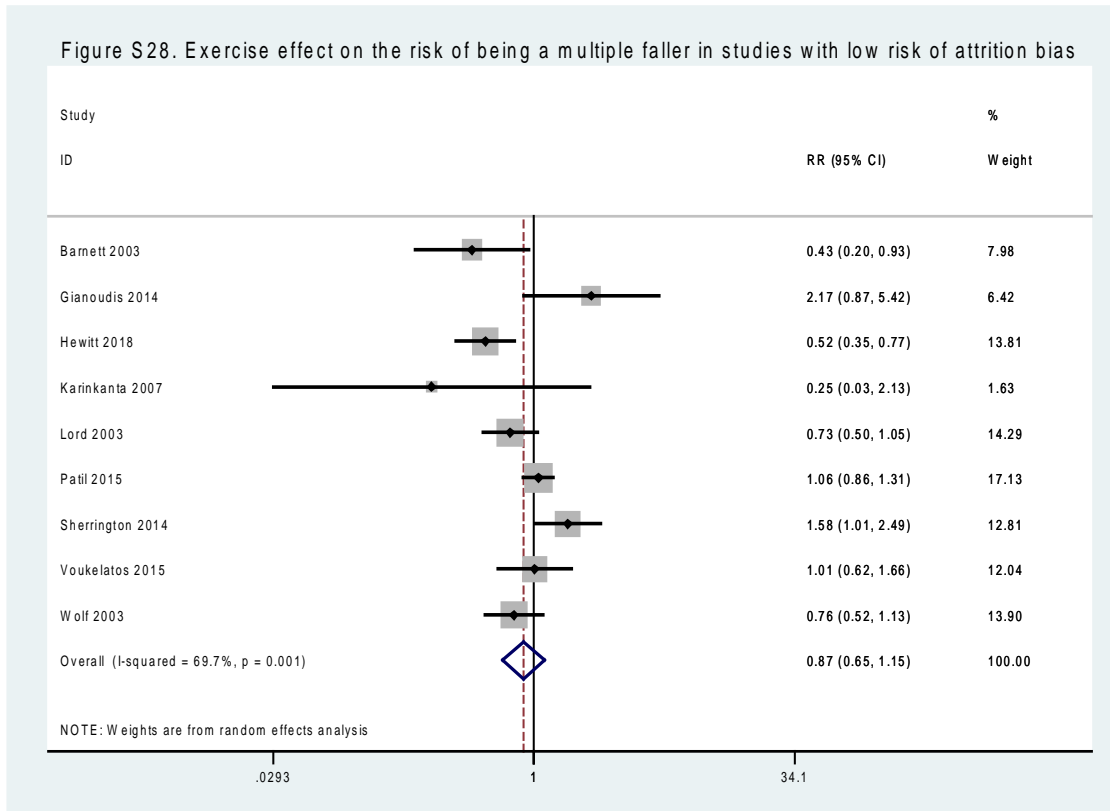

RR (95% CI): 0.87 (0.65-1.15), p=0.32  
 I<sup>2</sup>=69.7%

**Sub-group Analysis 1. Restricted to non-clinically/disease-specific studies**

Figure S29. Exercise effect on the risk of being a multiple faller in non-clinically specific population

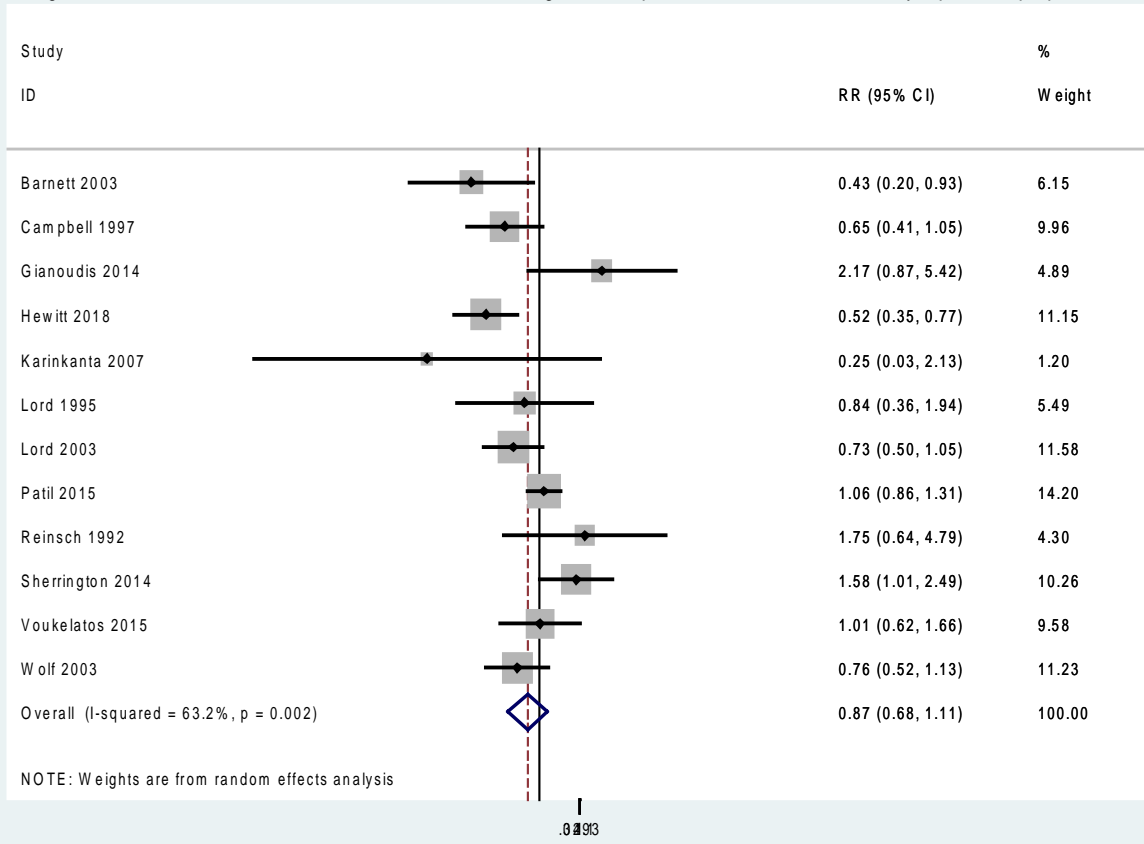

RR (95% CI): 0.87 (0.68-1.11), p=0.25  
 I<sup>2</sup>=63.2%

**Sub-group Analysis 2. Restricted to clinically/disease-specific studies**

Figure S30. Effect of exercise on the risk for multiple falls in clinically-specific disease population

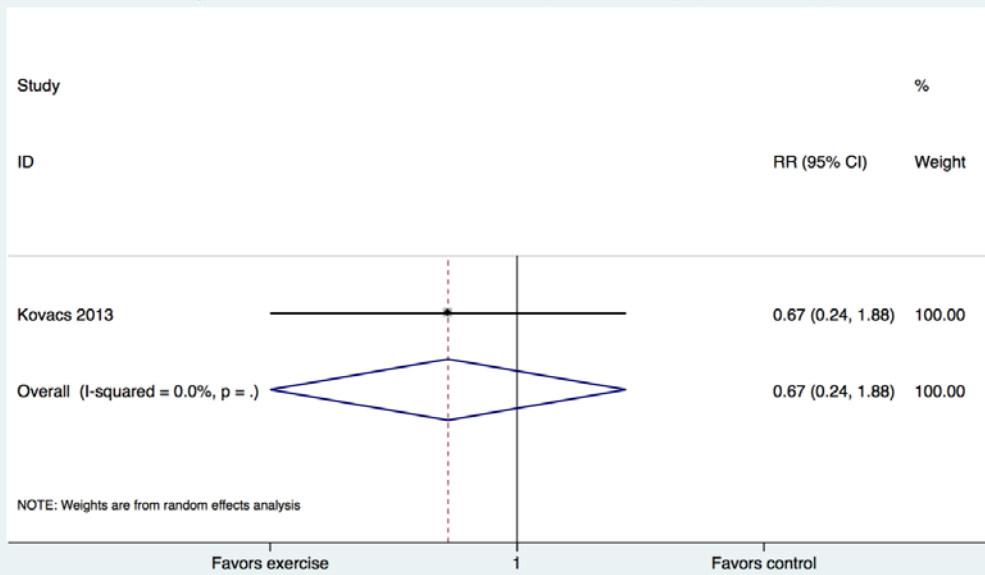

RR (95% CI): 0.67 (0.24-1.88), p=0.45  
 I<sup>2</sup>=

**Table S3. Meta-regression on the association between the risk of being a multiple faller and exercise-related variables**

| Meta-regression                                            | Categories               | Exp (b) (SE) | p-value |
|------------------------------------------------------------|--------------------------|--------------|---------|
| Exercise frequency (n=13)                                  | <2x/week (ref)           |              |         |
|                                                            | 3x/week                  | 1.29 (0.38)  | 0.40    |
|                                                            | >3x/week                 | 1.75 (0.55)  | 0.10    |
| Effective frequency (n=9)                                  | <2x/week (ref)           |              |         |
|                                                            | Between 2-3x/week        | 0.32 (0.40)  | 0.40    |
|                                                            | >3x/week                 | 2.01 (0.89)  | 0.16    |
| Exercise volume (n=10)                                     | <120 min/week (ref)      |              |         |
|                                                            | Between 120-179 min/week | 1.36 (0.37)  | 0.29    |
|                                                            | ≥180 min/week            | 2.76 (1.73)  | 0.15    |
| Effective volume (n=7)                                     | ≤60 min/week (ref)       |              |         |
|                                                            | Between 61-120 min/week  | 1.29 (0.49)  | 0.54    |
|                                                            | >120 min/week            | No studies   |         |
| Exercise intensity (n=11)                                  | Moderate (ref)           |              |         |
|                                                            | Vigorous intensity       | 1.90 (1.02)  | 0.26    |
| Exercise type (multicomponent only as reference) (n=13)    | Multicomponent (ref)     |              |         |
|                                                            | Aerobic                  | 1.15 (0.57)  | 0.78    |
|                                                            | Strength                 | 0.28 (0.34)  | 0.32    |
| Exercise type (others vs. multicomponent + balance) (n=13) | Others (ref)             |              |         |
|                                                            | Multicomponent + balance | 1.08 (0.36)  | 0.81    |

Legend: Exp: exponential, SE: standard error

## Appendix 10. Meta-analyses for the outcome “Injurious fallers”

### Funnel Plot

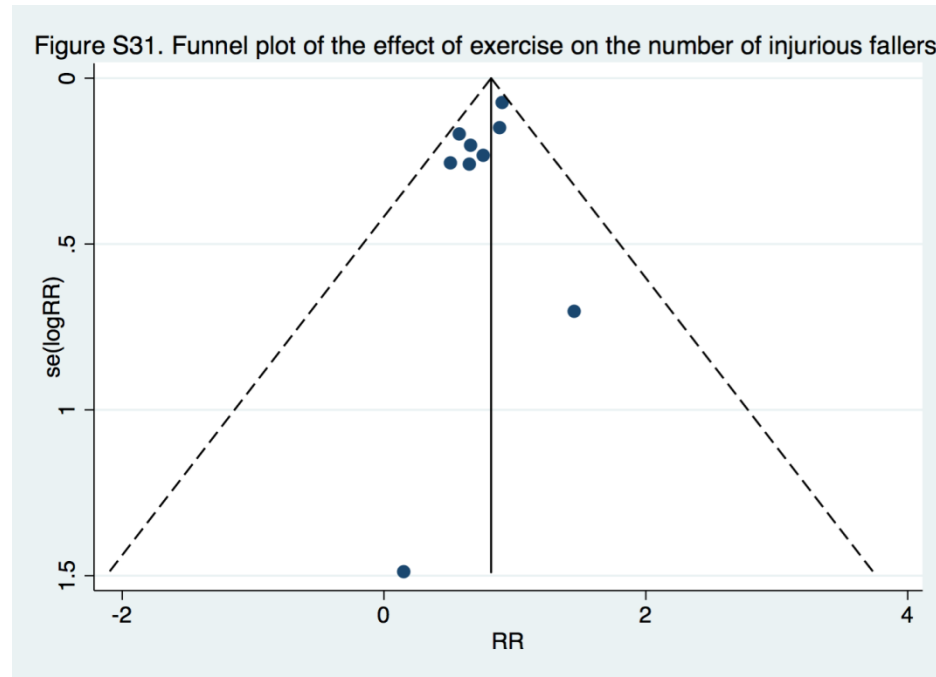

### Sensitivity Analysis 1. Fixed-effect model

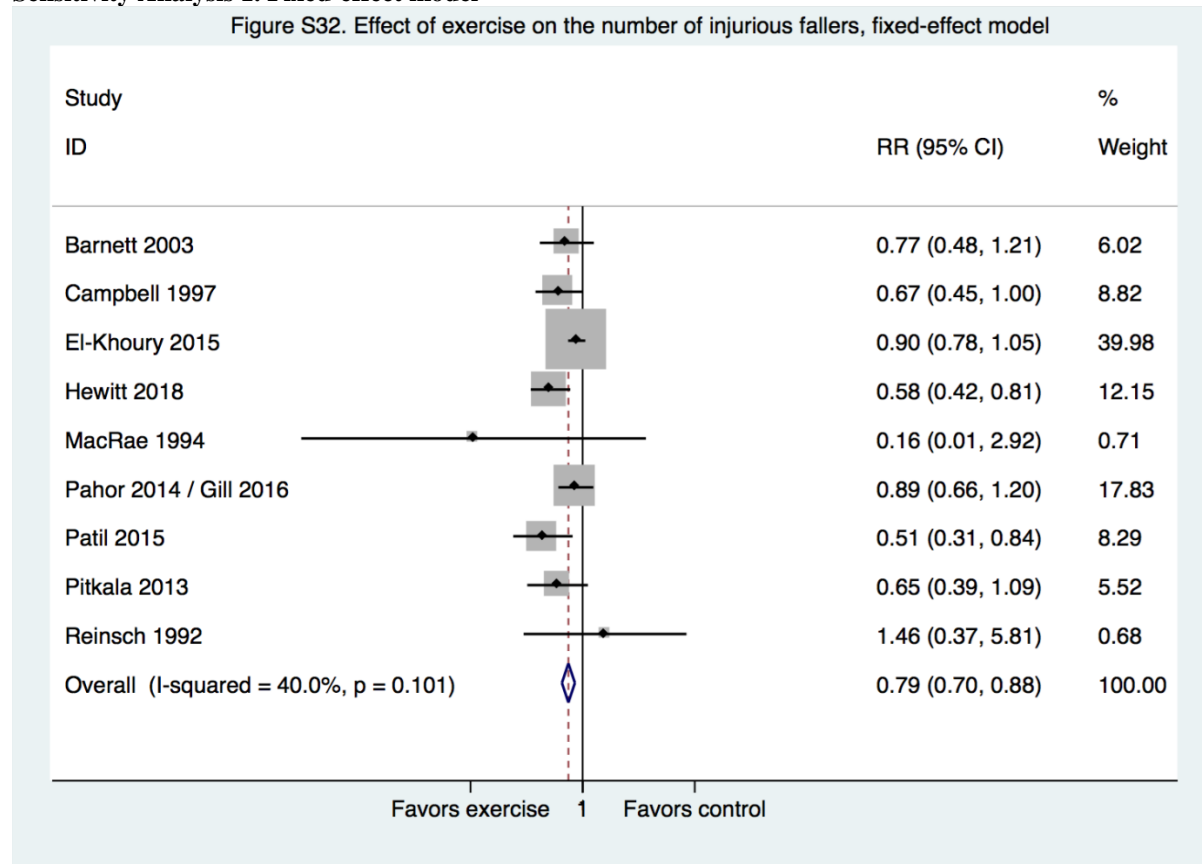

RR (95% CI): 0.79 (0.70-0.88),  $p < 0.001$   
 $I^2 = 40.0\%$

**Sensitivity Analysis 3. Excluding cluster-RCTs with no adjustments for the design effect**

Figure S33. Effect of exercise on the number of injurious fallers in parallel groups RCTs

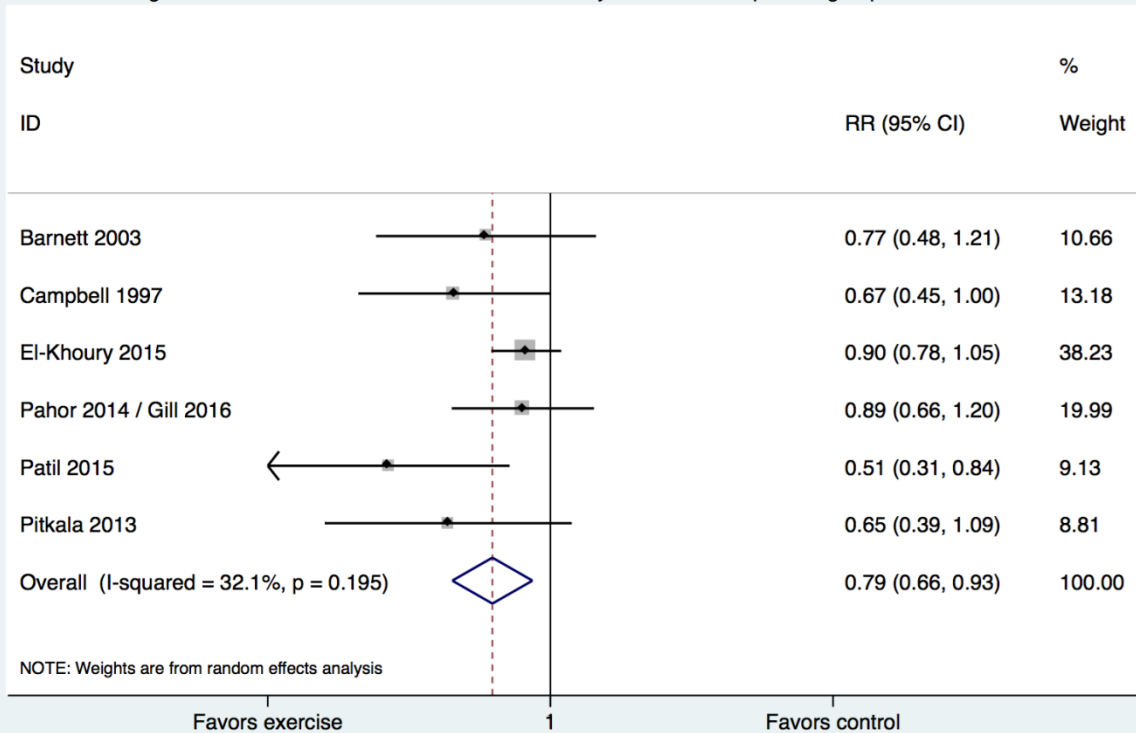

RR (95% CI): 0.79 (0.67-0.93), p=0.005  
 I<sup>2</sup>= 32.1%

**Sensitivity Analysis 5. Restricted to studies larger than the median (>203 participants)**

Figure S34. Effect of exercise on the number of injurious fallers in studies with >203 subjects

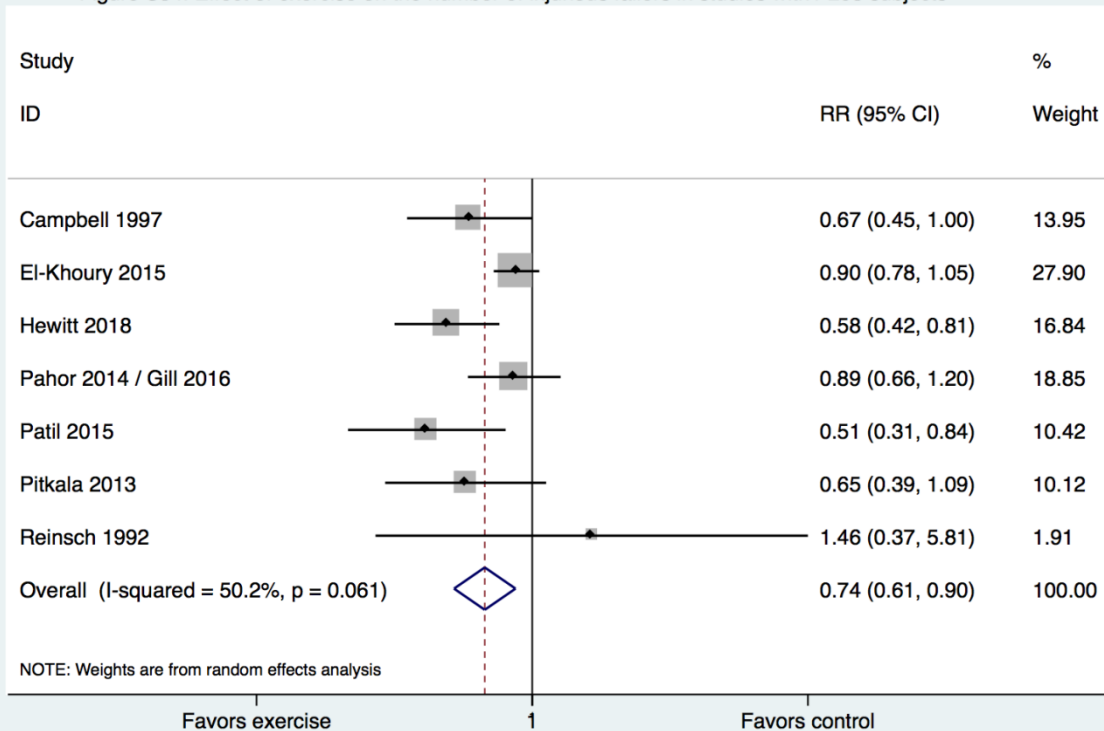

RR (95% CI): 0.74 (0.61-0.90), p=0.003

$I^2 = 50.2\%$

**Sensitivity Analysis 6. Restricted to studies with a low risk of attrition bias**

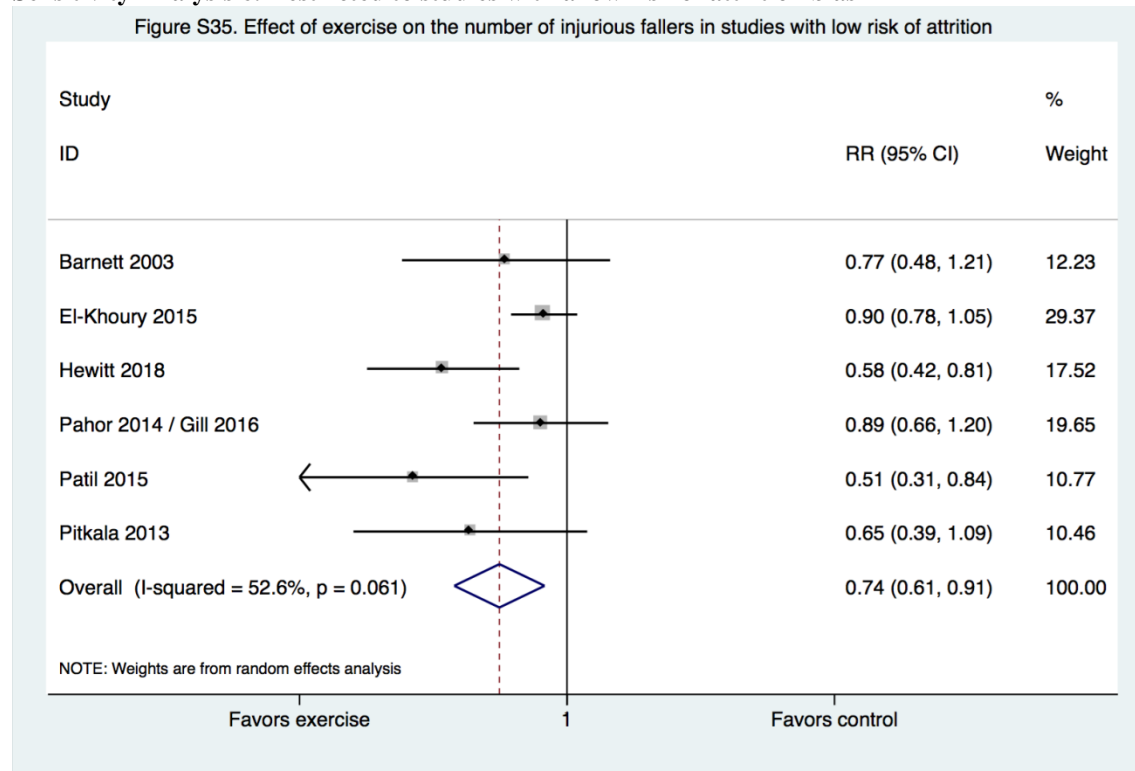

RR (95% CI): 0.74 (0.61-0.91), p=0.003

$I^2 = 52.6\%$

**Sub-group Analysis 1. Restricted to non-clinically/disease-specific studies**

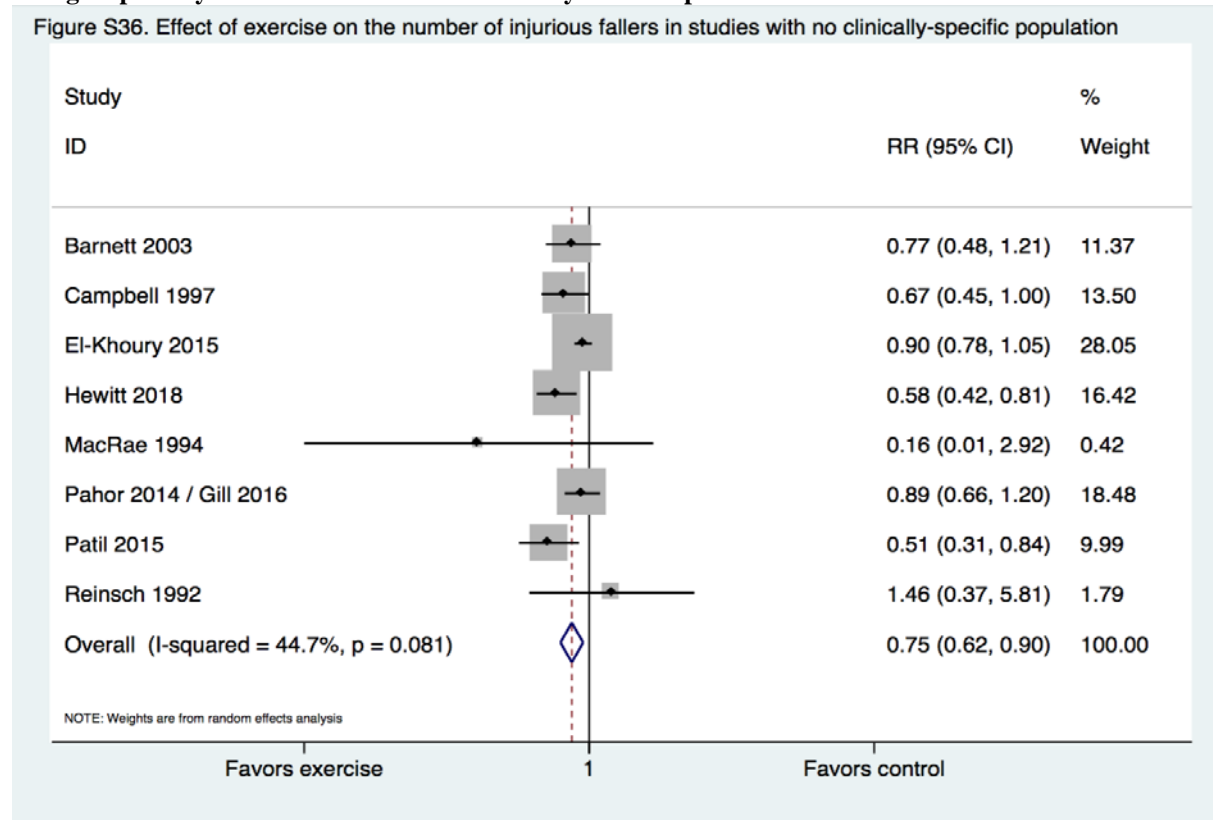

RR (95% CI): 0.75 (0.62-0.90), p=0.003



I<sup>2</sup> = 44.7%

**Sub-group Analysis 2. Restricted to clinically/disease-specific studies**

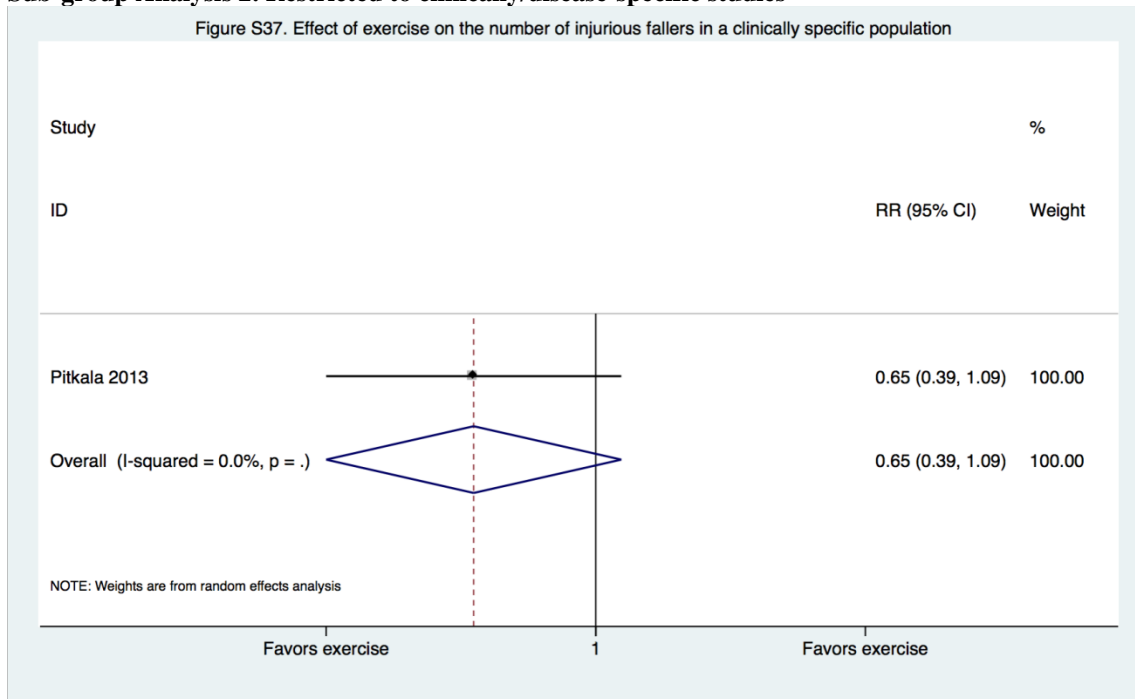

RR (95% CI): 0.65 (0.39-1.09), p=0.10

I<sup>2</sup> = none

## Appendix 11. Meta-analyses and meta-regressions for the outcome “People with fractures”

### Funnel Plot

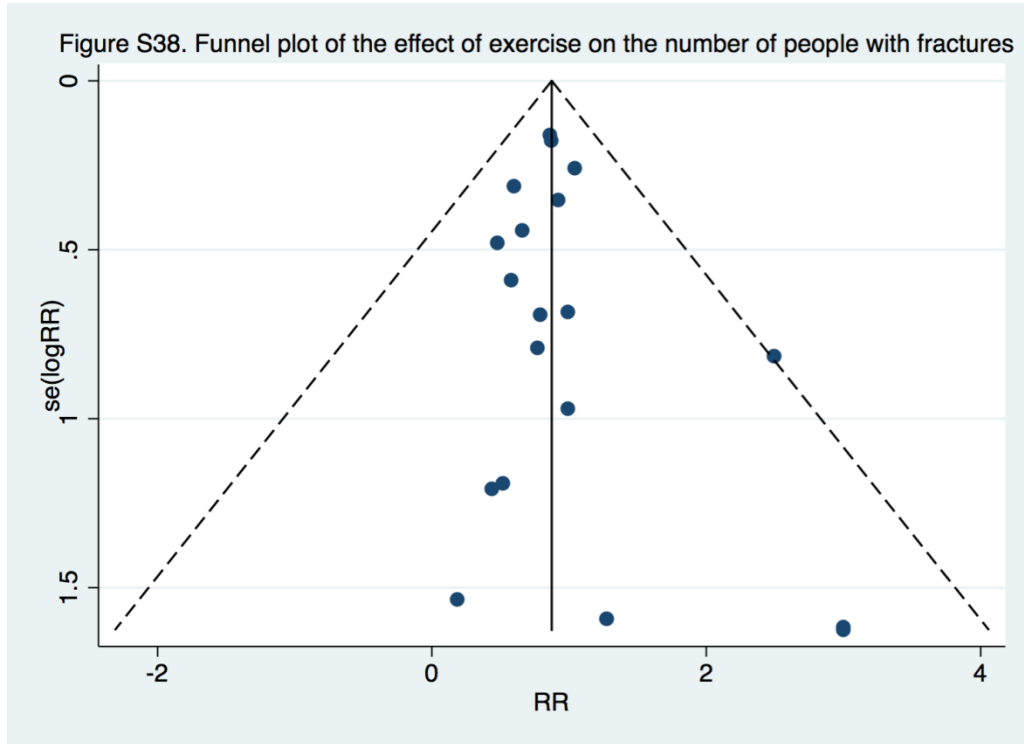

### Sensitivity Analysis. Excluding studies (n=5) without data on the number of people sustaining a fracture

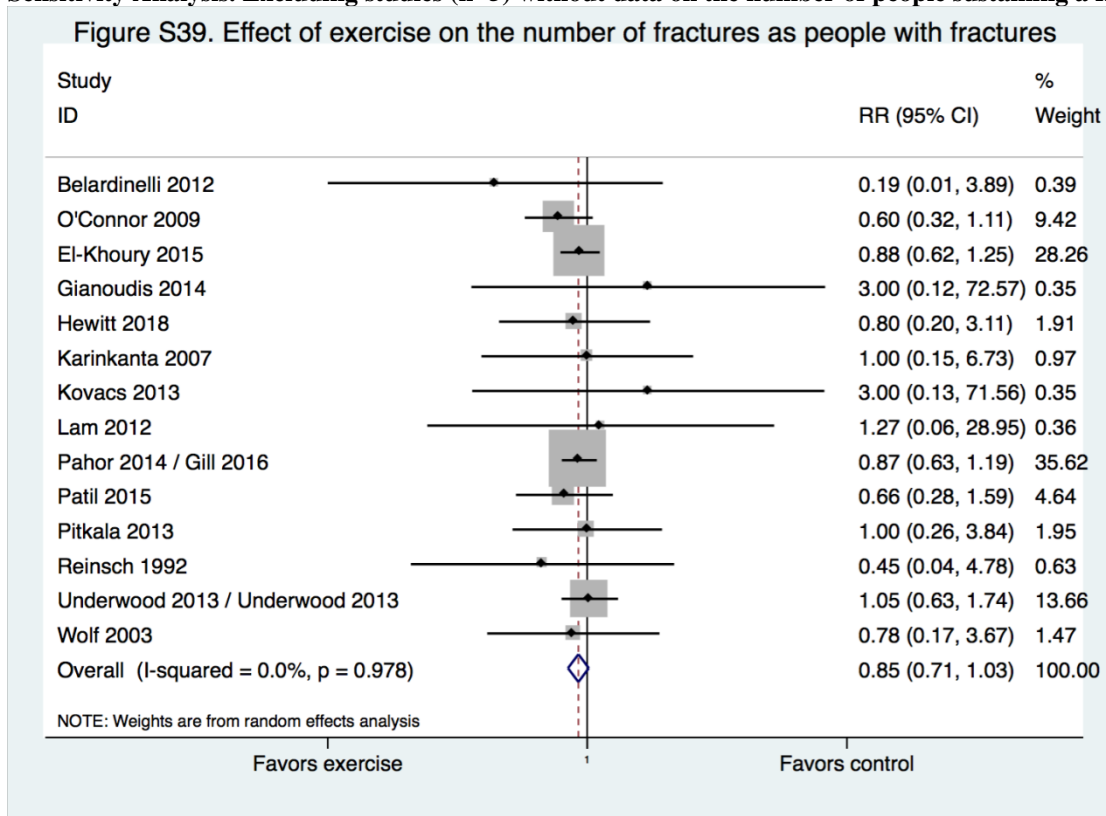

RR (95% CI): 0.85 (0.71-1.03), p=0.098

I<sup>2</sup>= 0.0%

### Sensitivity Analysis 1. Including studies with very low exercise compliance

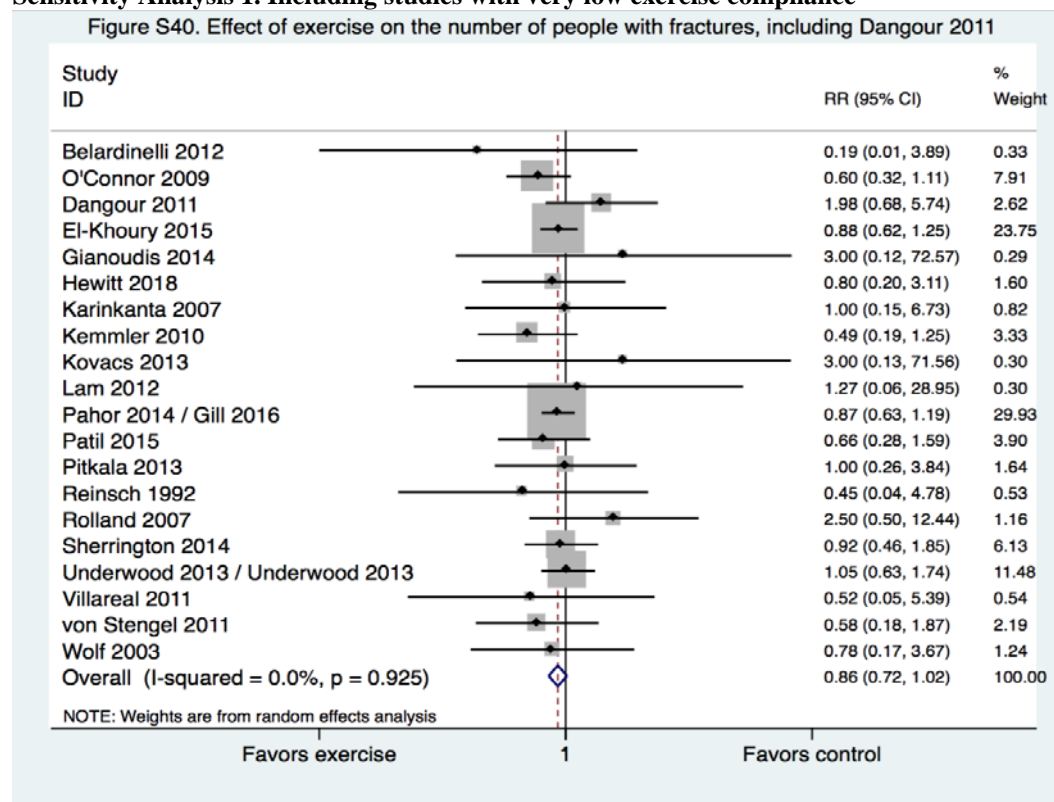

RR (95% CI): 0.86 (0.73-1.02), p=0.090  
 $I^2 = 0.0\%$

### Sensitivity Analysis 2. Using a fixed-effects model

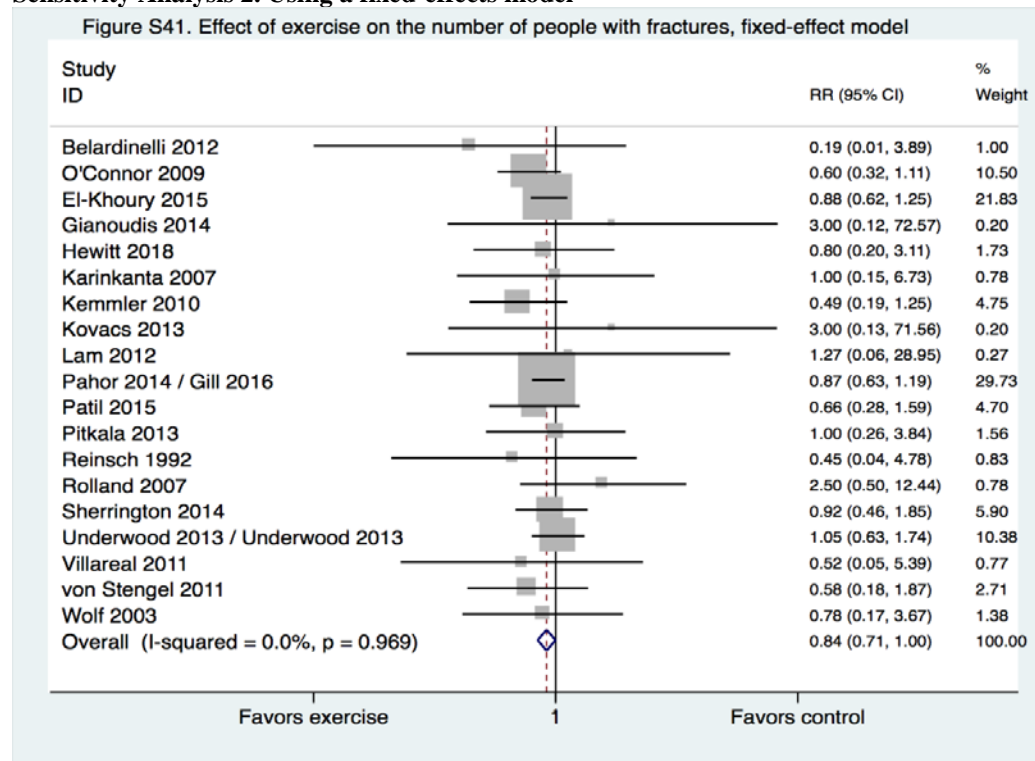

RR (95% CI): 0.84 (0.71-0.99), p=0.047  
 $I^2 = 0.0\%$

### Sensitivity Analysis 3. Excluding cluster-RCTs with no adjustments for the design effect

Figure S42. Effect of exercise on the number of people with fractures, removing cluster RCTs without DEFF

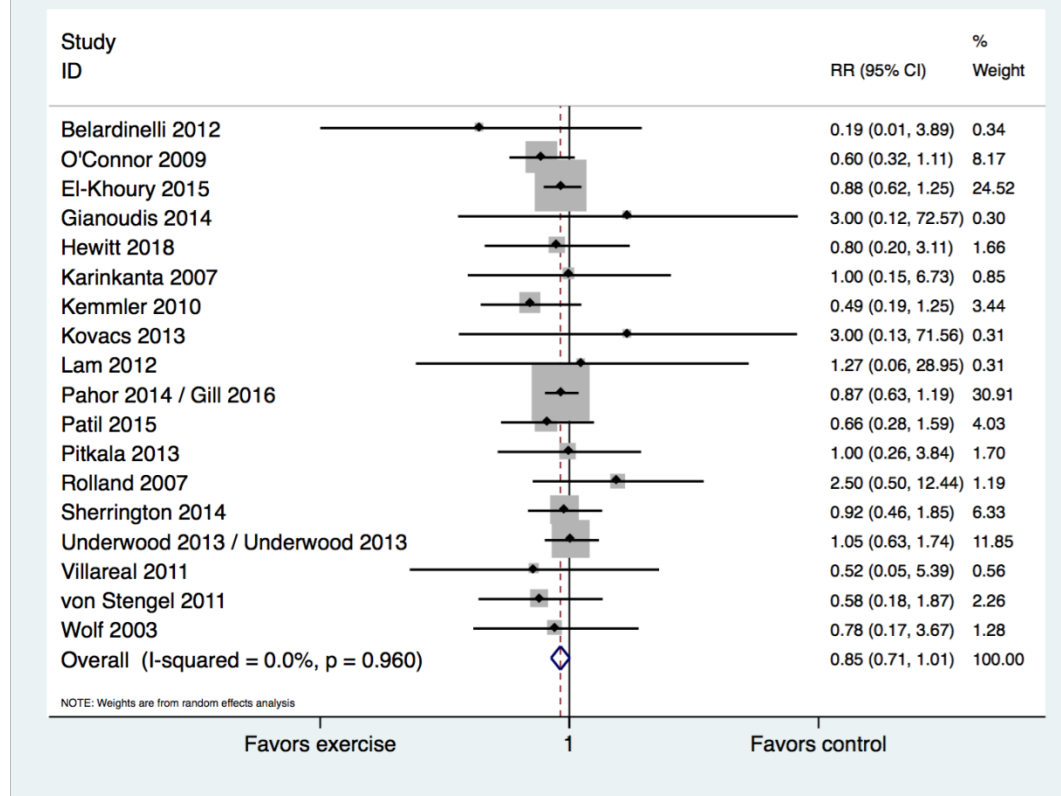

RR (95% CI): 0.85 (0.71-1.01), p=0.060

I<sup>2</sup>= 0.0%

### Sensitivity Analysis 4. Excluding studies in which the population had a mean age < 60 years

Figure S43. Effect of exercise on the number of fractures in people aged ≥ 60 yrs old

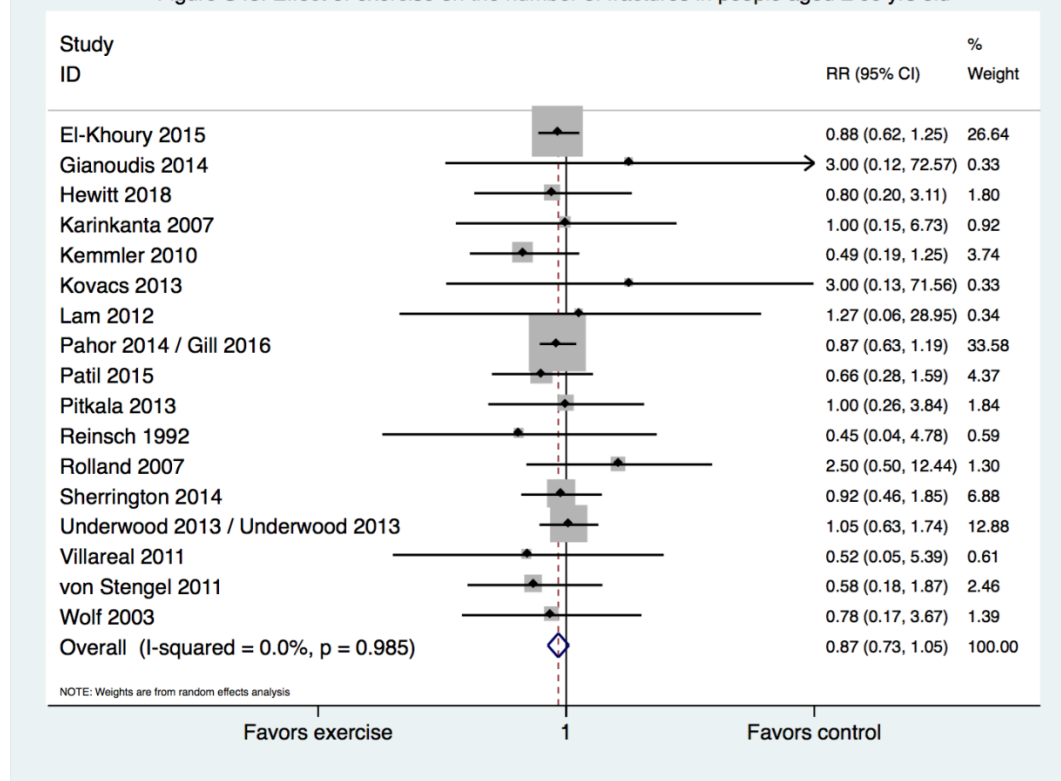

RR (95% CI): 0.87 (0.73-1.05), p=0.14

I<sup>2</sup>= 0.0%

**Sensitivity Analysis 5. Restricted to studies larger than the median (>203 participants)**

Figure S44. Effect of exercise on the number of people with fractures in studies with more than 203 subjects

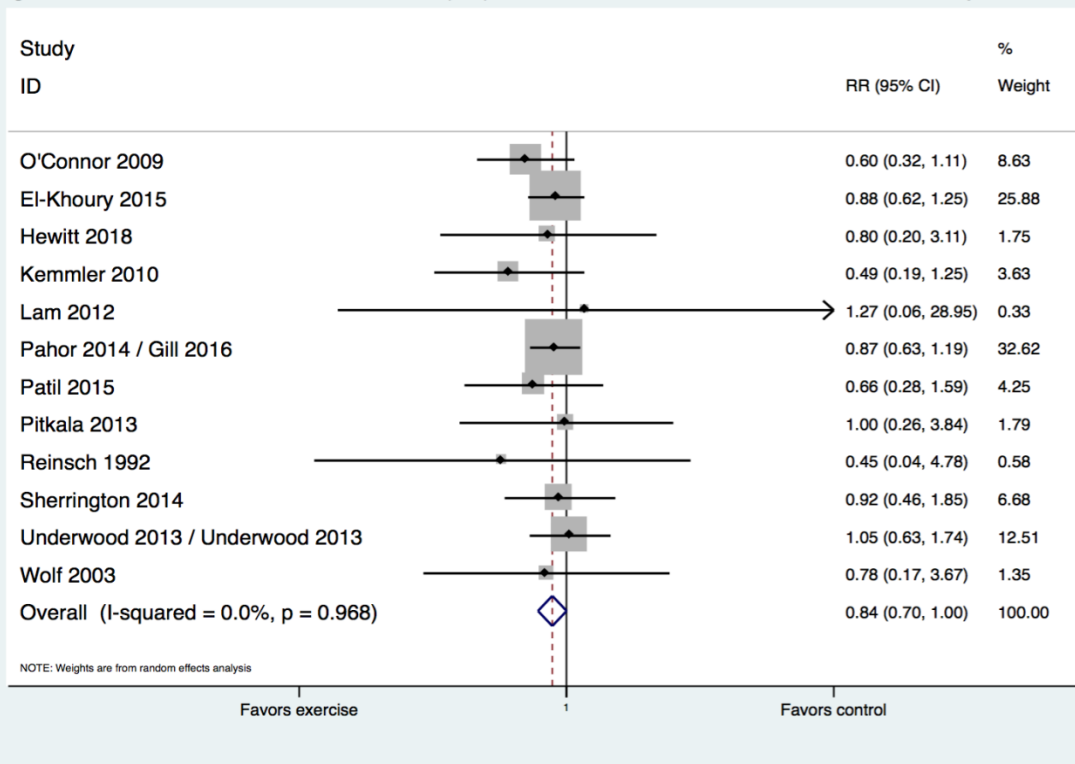

RR (95% CI): 0.84 (0.70-1.00), p=0.053

I<sup>2</sup>= 0.0%

**Sensitivity Analysis 6. Restricted to studies with a low risk of attrition bias**

Figure S45. Effect of exercise on the number of people with fractures in studies with low risk of attrition

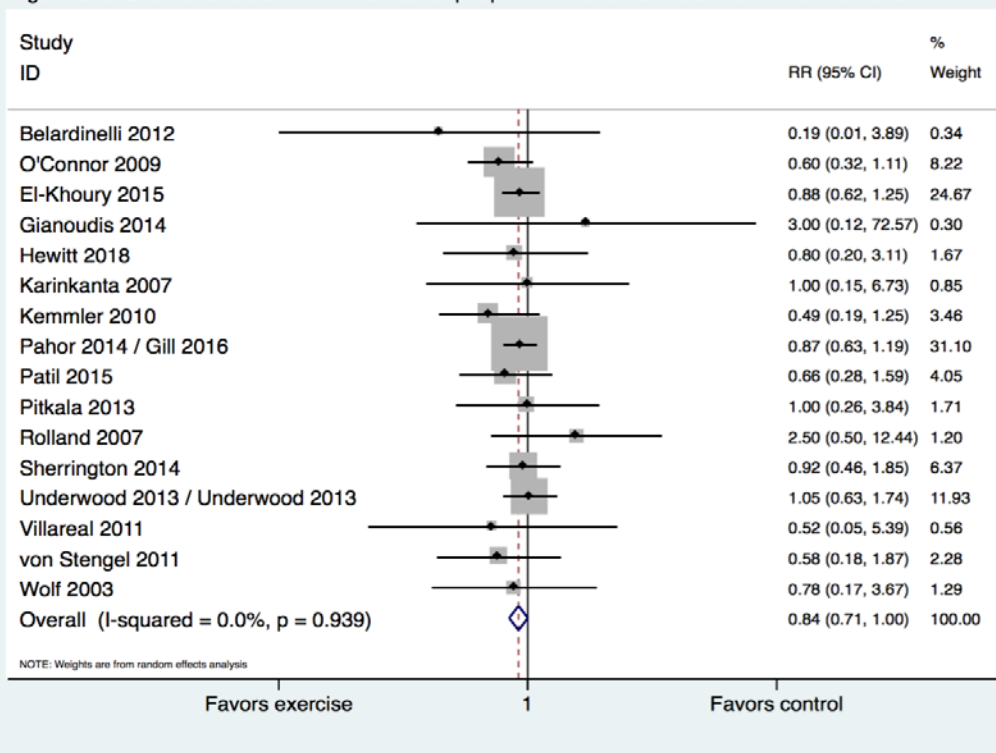

RR (95% CI): 0.84 (0.71-1.00), p=0.053

I<sup>2</sup>= 0.0%

### Sub-group Analysis 1. Restricted to non-clinically/disease-specific studies

Figure S46. Effect of exercise on the number of people with fractures in non clinically disease-specific populations

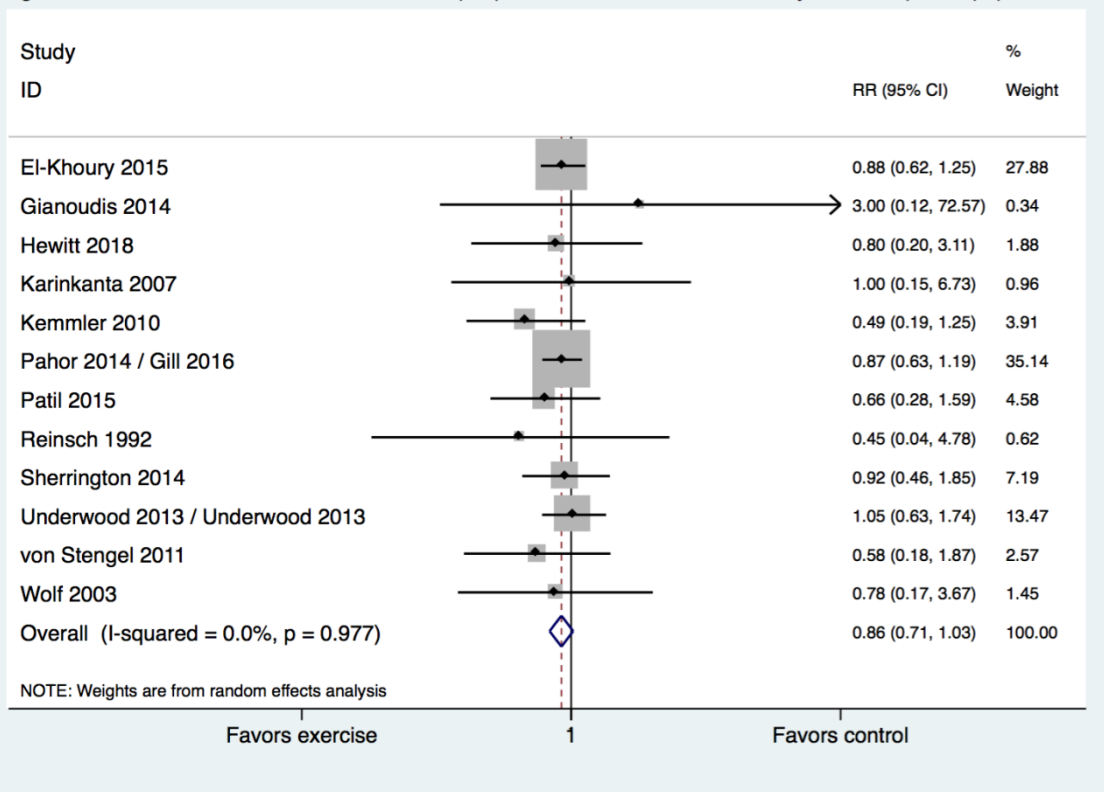

RR (95% CI): 0.86 (0.71-1.03), p=0.10  
I<sup>2</sup>= 0.0

### Sub-group Analysis 2. Restricted to clinically/disease-specific studies

Figure S47. Effect of exercise on the number of people with fractures in clinically disease-specific conditions

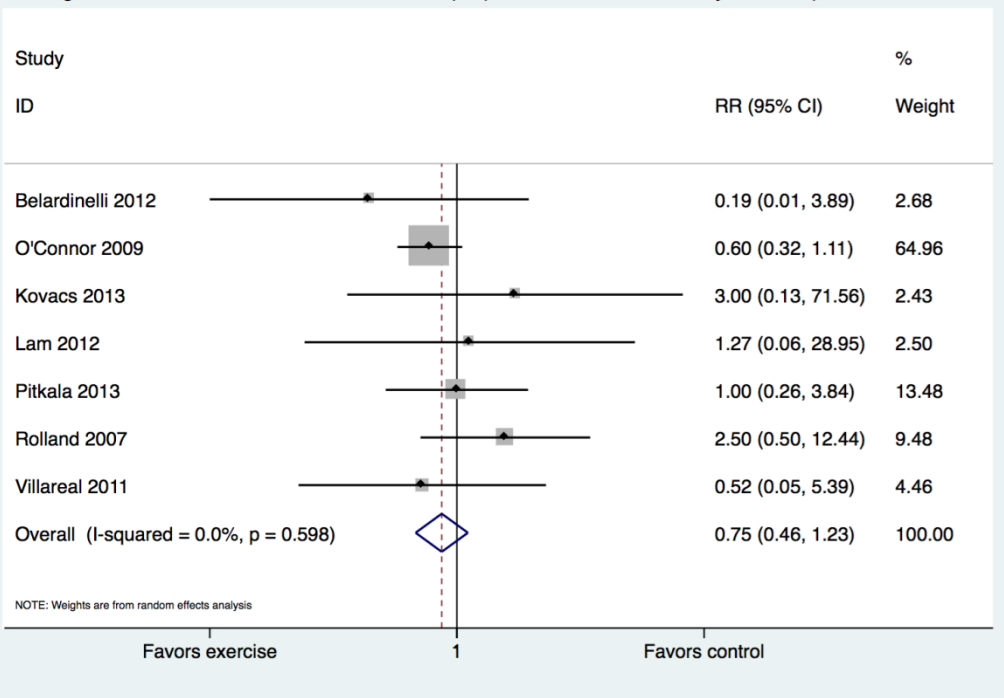

RR (95% CI): 0.75 (0.46-1.23), p=0.25  
I<sup>2</sup>= 0.0%

**Table S4. Meta-regression on the association between the risk of having sustained a fracture and exercise-related variables**

| Meta-regression                                            | Categories                 | Exp (b) (SE) | p-value |
|------------------------------------------------------------|----------------------------|--------------|---------|
| Exercise frequency (n=19)                                  | <2x/week (ref)             |              |         |
|                                                            | 3x/week                    | 0.89 (0.46)  | 0.83    |
|                                                            | >3x/week                   | 0.85 (0.15)  | 0.37    |
| Effective frequency (n=15)                                 | <2x/week (ref)             |              |         |
|                                                            | Between 2-3x/week          | 0.58 (0.20)  | 0.15    |
|                                                            | >3x/week                   | 0.95 (0.19)  | 0.78    |
| Exercise volume (n=16)                                     | <120/min/week (ref)        |              |         |
|                                                            | Between 120-179 min/week   | 0.86 (0.23)  | 0.58    |
|                                                            | ≥180 min/week              | 0.79 (0.21)  | 0.39    |
| Effective volume (n=13)                                    | ≤60 min/week (ref)         |              |         |
|                                                            | Between 61-120 min/week    | 0.79 (0.22)  | 0.41    |
|                                                            | >120 min/week              | 0.89 (0.19)  | 0.60    |
| Exercise intensity (n=18)                                  | Moderate (ref)             |              |         |
|                                                            | Vigorous intensity         | 0.71 (0.25)  | 0.35    |
| Exercise type (multicomponent only as reference) (n=19)    | Multicomponent (ref)       |              |         |
|                                                            | Aerobic                    | 0.66 (0.21)  | 0.21    |
|                                                            | Strength                   | 1.15 (1.12)  | 0.89    |
|                                                            | Others (tai-chi and dance) | 0.98 (0.70)  | 0.98    |
| Exercise type (others vs. multicomponent + balance) (n=19) | Others (ref)               |              |         |
|                                                            | Multicomponent + balance   | 1.03 (0.22)  | 0.89    |

Legend: Exp: exponential, SE: standard error

**Appendix 12. Number of participants and events included in the main analysis per study and per outcome.**

| Studies                         | Mortality           |                     | Hospitalization  |                 | Fallers (≥ 1 fall) |                 | Multiple fallers (≥ 2 falls) |                 | Number of people sustaining a fracture |                    | Number of injurious fallers |                 |
|---------------------------------|---------------------|---------------------|------------------|-----------------|--------------------|-----------------|------------------------------|-----------------|----------------------------------------|--------------------|-----------------------------|-----------------|
|                                 | Exercise cases/n    | Control cases/n     | Exercise cases/n | Control cases/n | Exercise cases/n   | Control cases/n | Exercise cases/n             | Control cases/n | Exercise cases/n                       | Control cases/n    | Exercise cases/n            | Control cases/n |
| <b>Belardinelli et al 2012</b>  | 4/63                | 10/60               | 8/63             | 25/60           | N/A                | N/A             | N/A                          | N/A             | 0/63                                   | 2/60               | N/A                         | N/A             |
| <b>Barnett 2003</b>             | 0/83                | 3/80                | N/A              | N/A             | 27/76              | 37/74           | 8/76                         | 18/74           | N/A                                    | N/A                | 22/76                       | 28/74           |
| <b>Campbell 1997</b>            | 2/116               | 4/117               | N/A              | N/A             | 53/116             | 62/117          | 22/116                       | 34/117          | N/A                                    | N/A                | 27/103                      | 43/110          |
| <b>Dangour 2011<sup>a</sup></b> | 9/450               | 6/504               | N/A              | N/A             | 189/402            | 198/398         | N/A                          | N/A             | 10/402                                 | 5/398              | N/A                         | N/A             |
| <b>El-Khoury 2015</b>           | 5/352               | 6/354               | N/A              | N/A             | 189/352            | 222/354         | N/A                          | N/A             | 49/352                                 | 56/354             | 170/352                     | 189/354         |
| <b>Galvao 2014</b>              | 1/50                | 0/50                | N/A              | N/A             | N/A                | N/A             | N/A                          | N/A             | N/A                                    | N/A                | N/A                         | N/A             |
| <b>Gianoudis 2014</b>           | 1/81                | 1/81                | N/A              | N/A             | 29/81              | 25/81           | 13/81                        | 6/81            | 1/81                                   | 0/81               | N/A                         | N/A             |
| <b>Hambrecht 2004</b>           | N/A                 | N/A                 | 1/51             | 6/50            | N/A                | N/A             | N/A                          | N/A             | N/A                                    | N/A                | N/A                         | N/A             |
| <b>Hewitt 2018</b>              | 15/113 <sup>b</sup> | 14/108 <sup>b</sup> | 8/113            | 12/108          | 50/113             | 73/108          | 26/113                       | 48/108          | 5/113 <sup>b</sup>                     | 6/108 <sup>b</sup> | 34/113                      | 56/108          |
| <b>Karinkanta 2007</b>          | 0/37                | 1/37                | N/A              | N/A             | 7/37               | 8/37            | 1/37                         | 4/37            | 2/37                                   | 2/37               | N/A                         | N/A             |
| <b>Kemmler 2010</b>             | 0/123               | 1/123               | N/A              | N/A             | N/A                | N/A             | N/A                          | N/A             | 6/115                                  | 12/112             | N/A                         | N/A             |
| <b>King 2002</b>                | 0/51                | 1/49                | N/A              | N/A             | N/A                | N/A             | N/A                          | N/A             | N/A                                    | N/A                | N/A                         | N/A             |
| <b>Kovacs 2003</b>              | 4/41                | 10/41               | 2/41             | 1/41            | 16/32              | 20/30           | 5/32                         | 7/30            | 1/41                                   | 0/41               | N/A                         | N/A             |
| <b>Lam 2012</b>                 | 1/171 <sup>b</sup>  | 2/218 <sup>b</sup>  | N/A              | N/A             | N/A                | N/A             | N/A                          | N/A             | 1/171 <sup>b</sup>                     | 1/218 <sup>b</sup> | N/A                         | N/A             |
| <b>Lam 2015</b>                 | 1/147               | 3/131               | N/A              | N/A             | N/A                | N/A             | N/A                          | N/A             | N/A                                    | N/A                | N/A                         | N/A             |
| <b>Lord 1995</b>                | N/A                 | N/A                 | N/A              | N/A             | 26/75              | 33/94           | 8/75                         | 12/94           | N/A                                    | N/A                | N/A                         | N/A             |
| <b>Lord 2003</b>                | 5/280 <sup>b</sup>  | 1/271 <sup>b</sup>  | N/A              | N/A             | 109/259            | 117/249         | 40/259                       | 53/249          | N/A                                    | N/A                | N/A                         | N/A             |



|                               |                     |                      |          |           |         |         |        |        |                     |                     |        |        |
|-------------------------------|---------------------|----------------------|----------|-----------|---------|---------|--------|--------|---------------------|---------------------|--------|--------|
| <b>MacRae 1994</b>            | N/A                 | N/A                  | N/A      | N/A       | 10/28   | 14/31   | N/A    | N/A    | N/A                 | N/A                 | 0/28   | 3/31   |
| <b>Merom 2016</b>             | 3/277 <sup>b</sup>  | 2/251 <sup>b</sup>   | N/A      | N/A       | N/A     | N/A     | N/A    | N/A    | N/A                 | N/A                 | N/A    | N/A    |
| <b>Messier 2013</b>           | N/A                 | N/A                  | 4/136    | 0/129     | 4/136   | 1/129   | N/A    | N/A    | N/A                 | N/A                 | N/A    | N/A    |
| <b>Munro 2004<sup>a</sup></b> | 283/2283            | 505/4137             | 853/2283 | 1473/4137 | N/A     | N/A     | N/A    | N/A    | N/A                 | N/A                 | N/A    | N/A    |
| <b>Mustata 2011</b>           | N/A                 | N/A                  | 0/10     | 1/10      | 0/10    | 2/10    | N/A    | N/A    | N/A                 | N/A                 | N/A    | N/A    |
| <b>O'Connor 2009</b>          | 189/1159            | 198/1171             | 729/1159 | 760/1172  | N/A     | N/A     | N/A    | N/A    | 16/1159             | 27/1172             | N/A    | N/A    |
| <b>Pahor 2006</b>             | 2/213               | 2/211                | 44/213   | 44/211    | N/A     | N/A     | N/A    | N/A    | N/A                 | N/A                 | N/A    | N/A    |
| <b>Pahor 2014</b>             | 48/818              | 42/817               | 396/818  | 360/817   | N/A     | N/A     | N/A    | N/A    | 66/818              | 76/817              | 75/818 | 84/817 |
| <b>Park 2008</b>              | N/A                 | N/A                  | N/A      | N/A       | 4/25    | 5/25    | N/A    | N/A    | N/A                 | N/A                 | N/A    | N/A    |
| <b>Patil 2015</b>             | 0/205               | 4/204                | N/A      | N/A       | 140/205 | 141/204 | 98/205 | 92/204 | 8/205               | 12/204              | 20/205 | 39/204 |
| <b>Pitkala 2013</b>           | 2/70                | 8/70                 | 29/70    | 37/70     | 29/70   | 35/70   | N/A    | N/A    | 4/70                | 4/70                | 17/70  | 26/70  |
| <b>Prescott 2008</b>          | 2/36                | 4/30                 | N/A      | N/A       | N/A     | N/A     | N/A    | N/A    | N/A                 | N/A                 | N/A    | N/A    |
| <b>Reinsch 1992</b>           | N/A                 | N/A                  | N/A      | N/A       | 22/57   | 17/50   | 10/57  | 5/50   | 1/56                | 2/50                | 5/57   | 3/50   |
| <b>Rejeski 2017</b>           | 0/81                | 1/82                 | 1/81     | 0/82      | N/A     | N/A     | N/A    | N/A    | N/A                 | N/A                 | N/A    | N/A    |
| <b>Rolland 2007</b>           | 7/67                | 8/67                 | 20/67    | 11/67     | N/A     | N/A     | N/A    | N/A    | 5/67                | 2/67                | N/A    | N/A    |
| <b>Sherrington 2014</b>       | 10/171              | 9/169                | N/A      | N/A       | 98/171  | 70/169  | 40/171 | 25/169 | 14/171              | 15/169              | N/A    | N/A    |
| <b>Underwood 2013</b>         | 98/398 <sup>b</sup> | 114/493 <sup>b</sup> | N/A      | N/A       | N/A     | N/A     | N/A    | N/A    | 33/398 <sup>b</sup> | 39/493 <sup>b</sup> | N/A    | N/A    |
| <b>Van Uffelen 2008</b>       | 0/86                | 1/93                 | N/A      | N/A       | N/A     | N/A     | N/A    | N/A    | N/A                 | N/A                 | N/A    | N/A    |
| <b>Villareal 2011</b>         | N/A                 | N/A                  | N/A      | N/A       | N/A     | N/A     | N/A    | N/A    | 1/26                | 2/27                | N/A    | N/A    |
| <b>Von Stengel 2011</b>       | 0/50                | 1/51                 | N/A      | N/A       | N/A     | N/A     | N/A    | N/A    | 4/50                | 7/51                | N/A    | N/A    |
| <b>Voukelatos 2015</b>        | 4/192               | 0/194                | N/A      | N/A       | 54/159  | 68/180  | 25/159 | 28/180 | N/A                 | N/A                 | N/A    | N/A    |
| <b>Winters-Stone 2011</b>     | N/A                 | N/A                  | N/A      | N/A       | N/A     | N/A     | N/A    | N/A    | N/A                 | N/A                 | N/A    | N/A    |

|                  |                    |                    |     |     |        |        |        |        |                    |                    |     |     |
|------------------|--------------------|--------------------|-----|-----|--------|--------|--------|--------|--------------------|--------------------|-----|-----|
| <b>Wolf 2003</b> | 2/146 <sup>b</sup> | 2/141 <sup>b</sup> | N/A | N/A | 69/145 | 85/141 | 33/145 | 42/141 | 4/145 <sup>b</sup> | 5/141 <sup>b</sup> | N/A | N/A |
| <b>Woo 2007</b>  | N/A                | N/A                | N/A | N/A | 15/60  | 31/60  | N/A    | N/A    | N/A                | N/A                | N/A | N/A |

**Note.** N/A, not applicable – N/A was used when either no usable data was available or no event occurred in both exercisers and controls

<sup>a</sup>These studies did not enter into the primary analysis for any of the outcomes due to low compliance to the intervention

<sup>b</sup>For these cluster RCTs, intra-cluster correlation (ICC) values were used to estimate the effective sample size using the design effect
